# Supplementary material for: Ferric perchlorate-mediated one-step reaction of [60]fullerene with primary amides for the synthesis of fullerooxazoles
Source: Royal Society of Chemistry journal article supplement (doi:10.1039/c5nj02503f), 2015-11-30

## Electronic Supplementary Information

### Ferric perchlorate-mediated one-step reaction of [60]fullerene with primary amides for the synthesis of fullerooxazoles

Xiao-Feng Zhang, Fa-Bao Li,\* Ji-Long Shi, Jun Wu and Li Liu\*

*Hubei Collaborative Innovation Center for Advanced Organic Chemical Materials,  
Ministry of Education Key Laboratory for the Synthesis and Application of Organic  
Functional Molecules, and School of Chemistry and Chemical Engineering, Hubei*

*University, Wuhan 430062, P. R. China*

*lfb0615@hubu.edu.cn and liulihubei@hubu.edu.cn*

|                                                    |         |
|----------------------------------------------------|---------|
| UV-vis spectrum of fullerooxazole <b>2g</b>        | S2      |
| UV-vis spectrum of fullerooxazole <b>2h</b>        | S3      |
| UV-vis spectrum of fullerooxazole <b>2o</b>        | S4      |
| <sup>1</sup> H NMR spectrum of compound <b>2a</b>  | S5      |
| <sup>13</sup> C NMR spectrum of compound <b>2a</b> | S6-S7   |
| <sup>1</sup> H NMR spectrum of compound <b>2b</b>  | S8      |
| <sup>1</sup> H NMR spectrum of compound <b>2c</b>  | S9      |
| <sup>1</sup> H NMR spectrum of compound <b>2d</b>  | S10     |
| <sup>1</sup> H NMR spectrum of compound <b>2e</b>  | S11     |
| <sup>1</sup> H NMR spectrum of compound <b>2f</b>  | S12     |
| <sup>1</sup> H NMR spectrum of compound <b>2g</b>  | S13     |
| <sup>13</sup> C NMR spectrum of compound <b>2g</b> | S14-S15 |
| <sup>1</sup> H NMR spectrum of compound <b>2h</b>  | S16     |
| <sup>13</sup> C NMR spectrum of compound <b>2h</b> | S17-S18 |
| <sup>1</sup> H NMR spectrum of compound <b>2i</b>  | S19     |
| <sup>1</sup> H NMR spectrum of compound <b>2j</b>  | S20     |
| <sup>1</sup> H NMR spectrum of compound <b>2k</b>  | S21     |
| <sup>1</sup> H NMR spectrum of compound <b>2l</b>  | S22     |
| <sup>1</sup> H NMR spectrum of compound <b>2m</b>  | S23     |
| <sup>1</sup> H NMR spectrum of compound <b>2n</b>  | S24     |
| <sup>1</sup> H NMR spectrum of compound <b>2o</b>  | S25     |
| <sup>13</sup> C NMR spectrum of compound <b>2o</b> | S26-S27 |

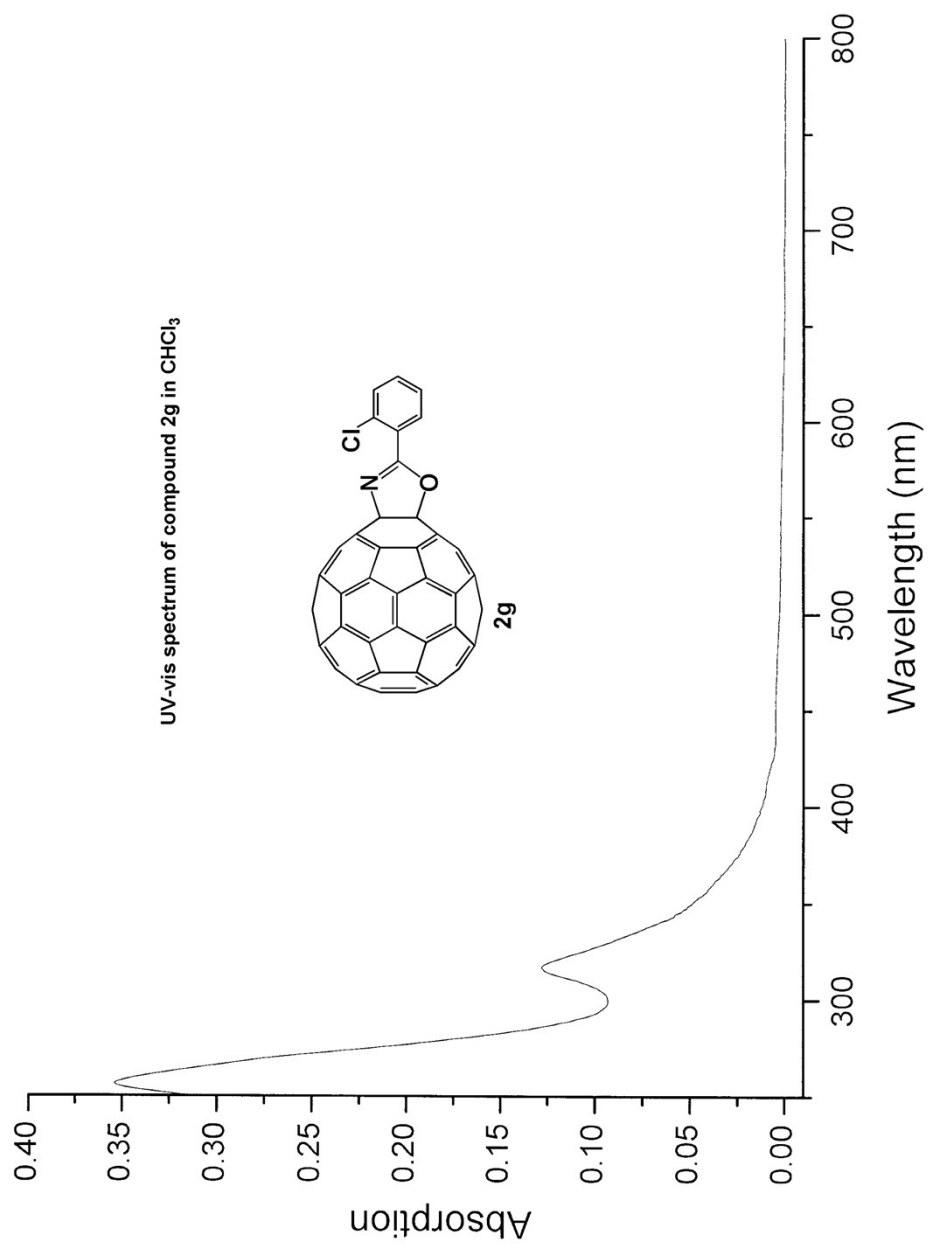

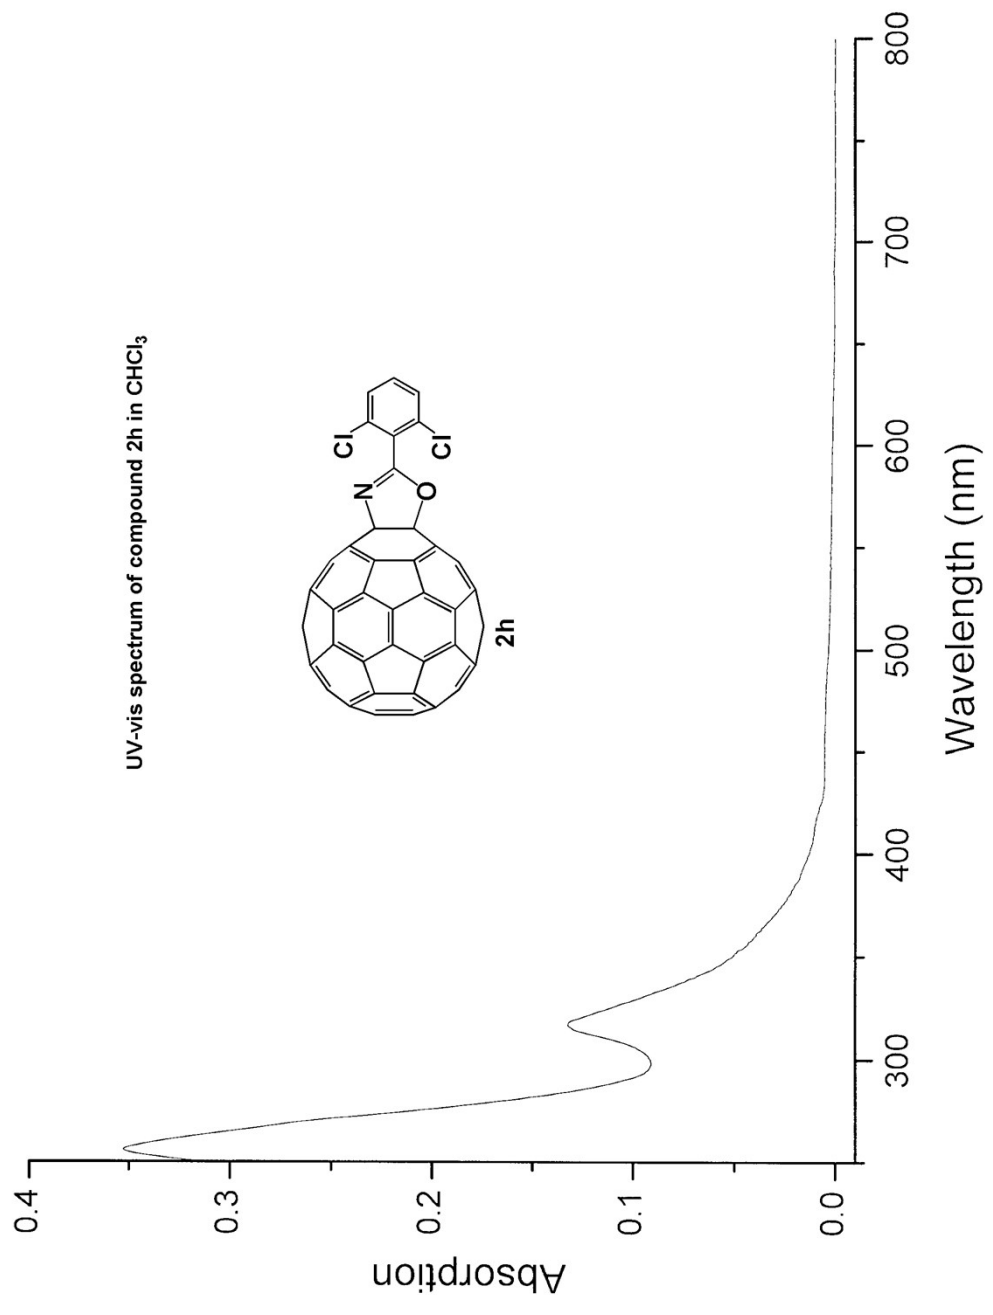

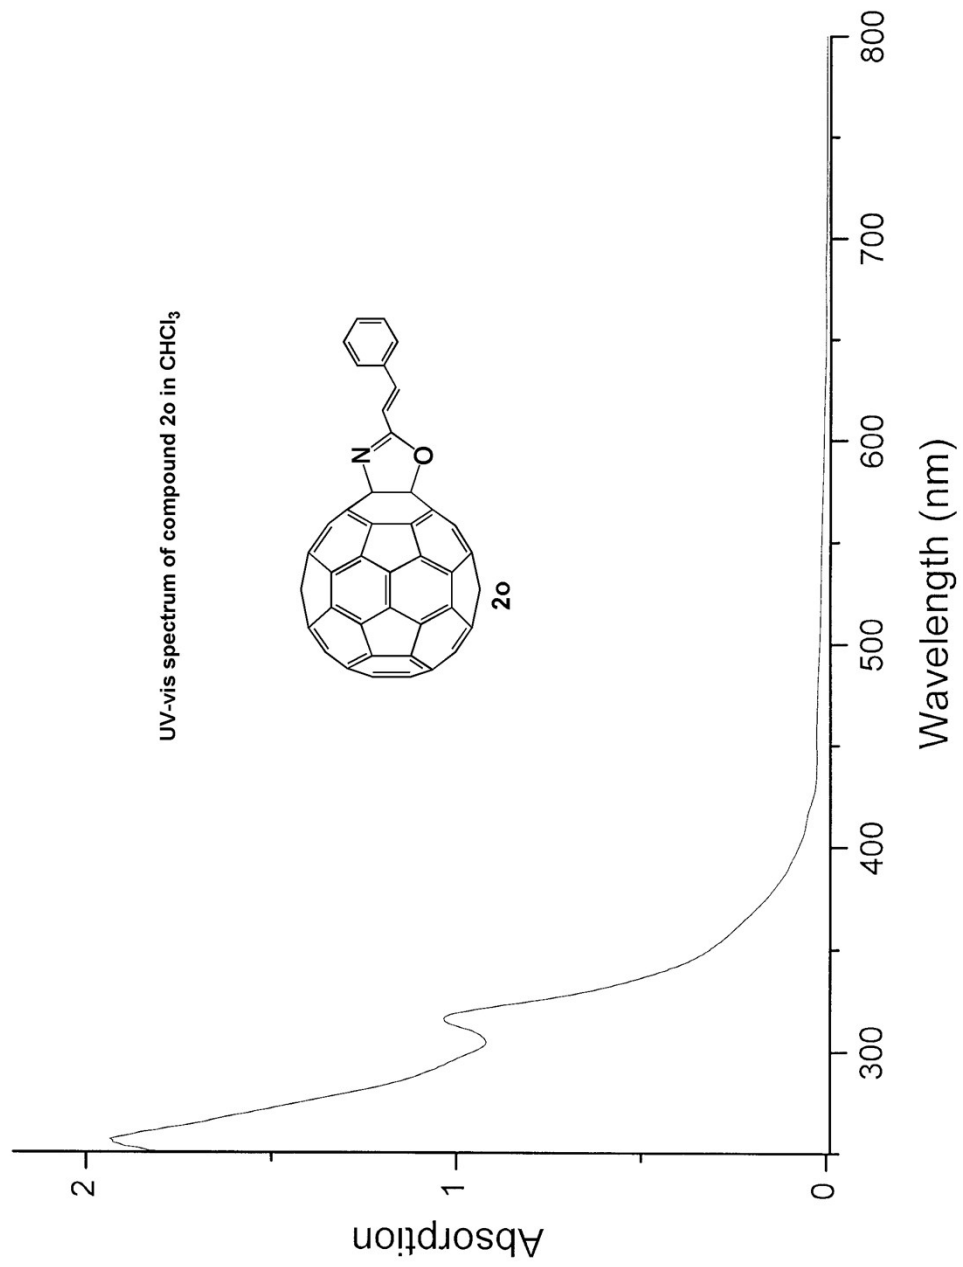

<sup>1</sup>H NMR (400 MHz, CS<sub>2</sub>/DMSO-d<sub>6</sub>) of compound **2a**

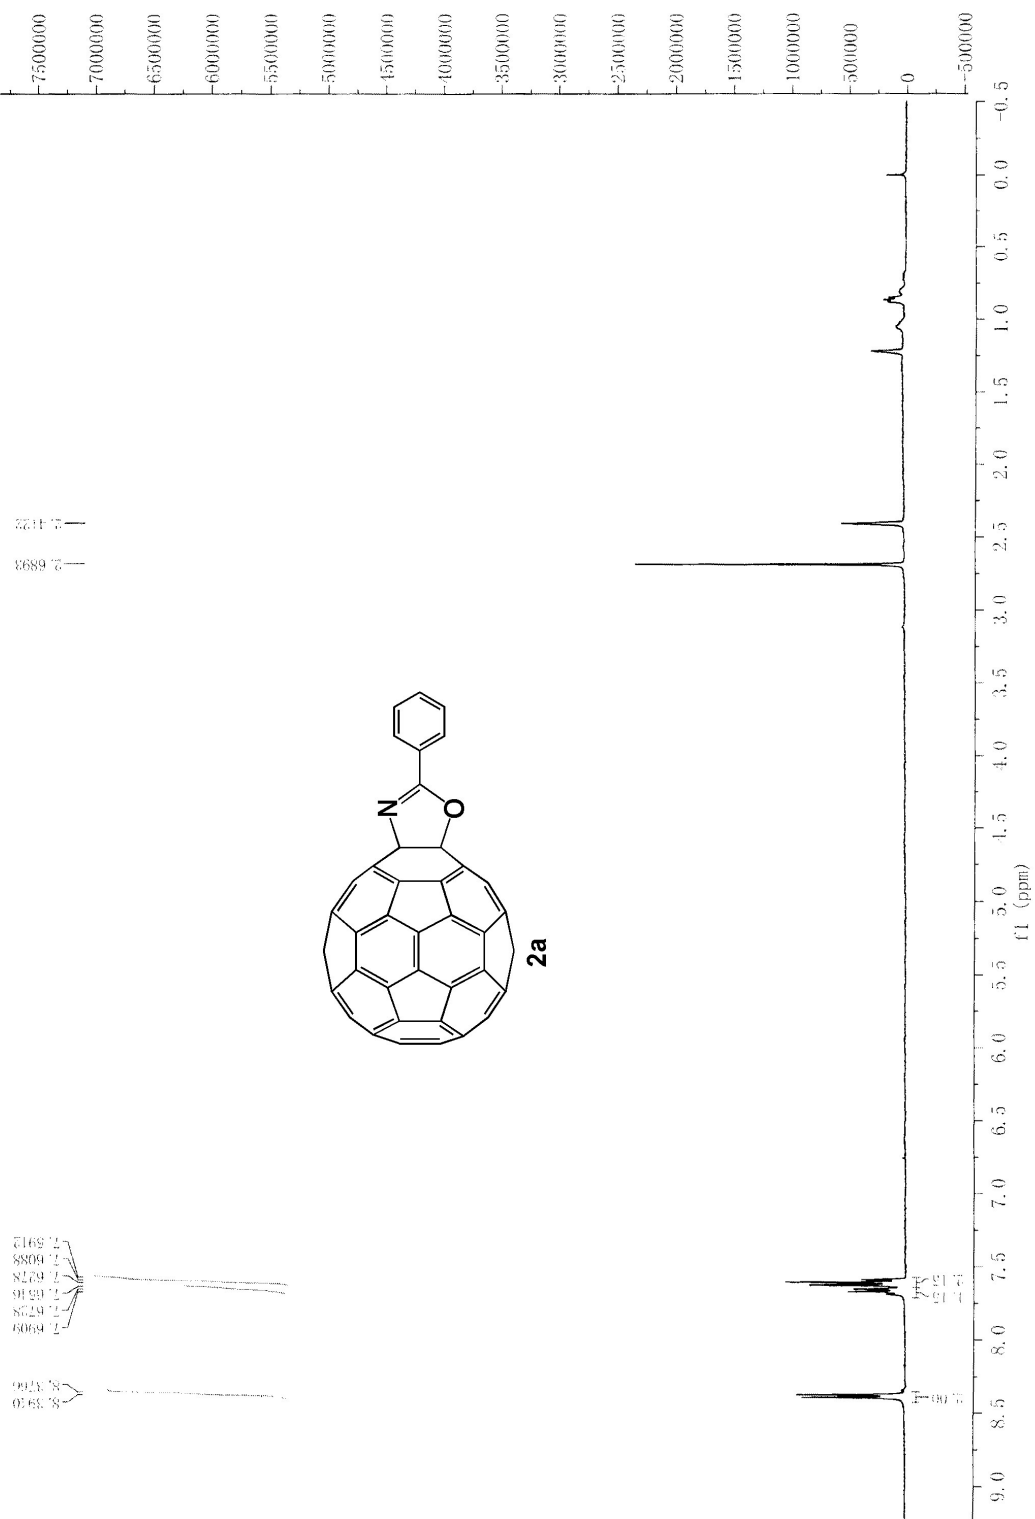

<sup>13</sup>C NMR (100 MHz, CS<sub>2</sub>/DMSO-d<sub>6</sub>) of compound 2a

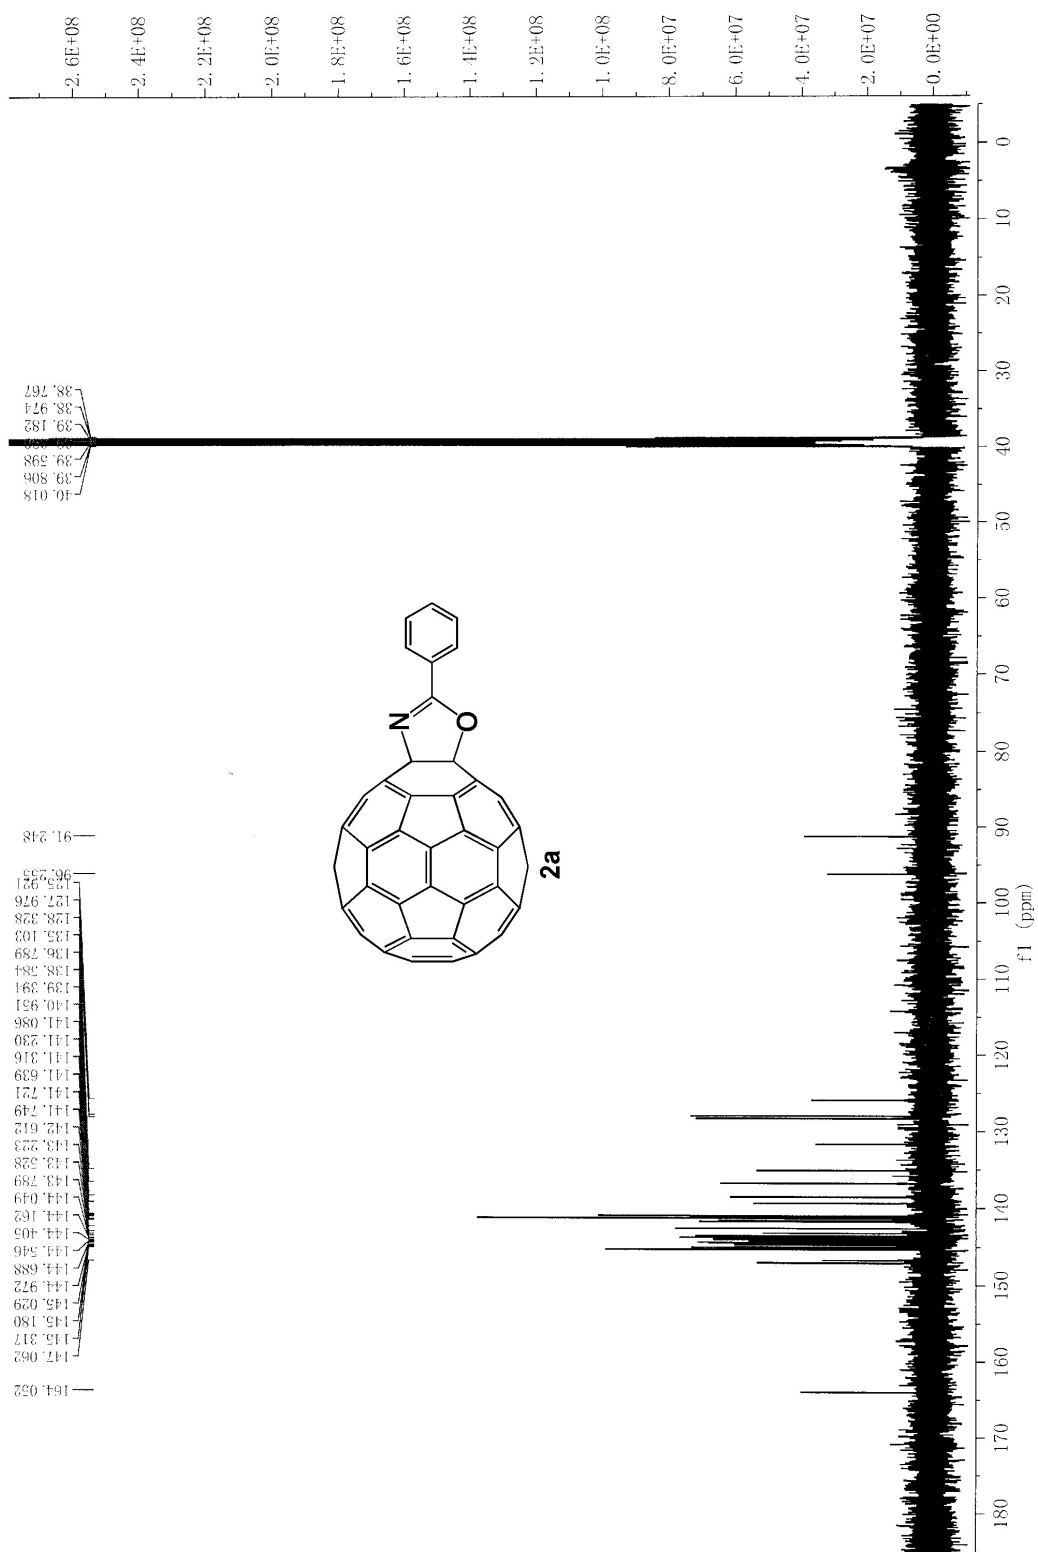

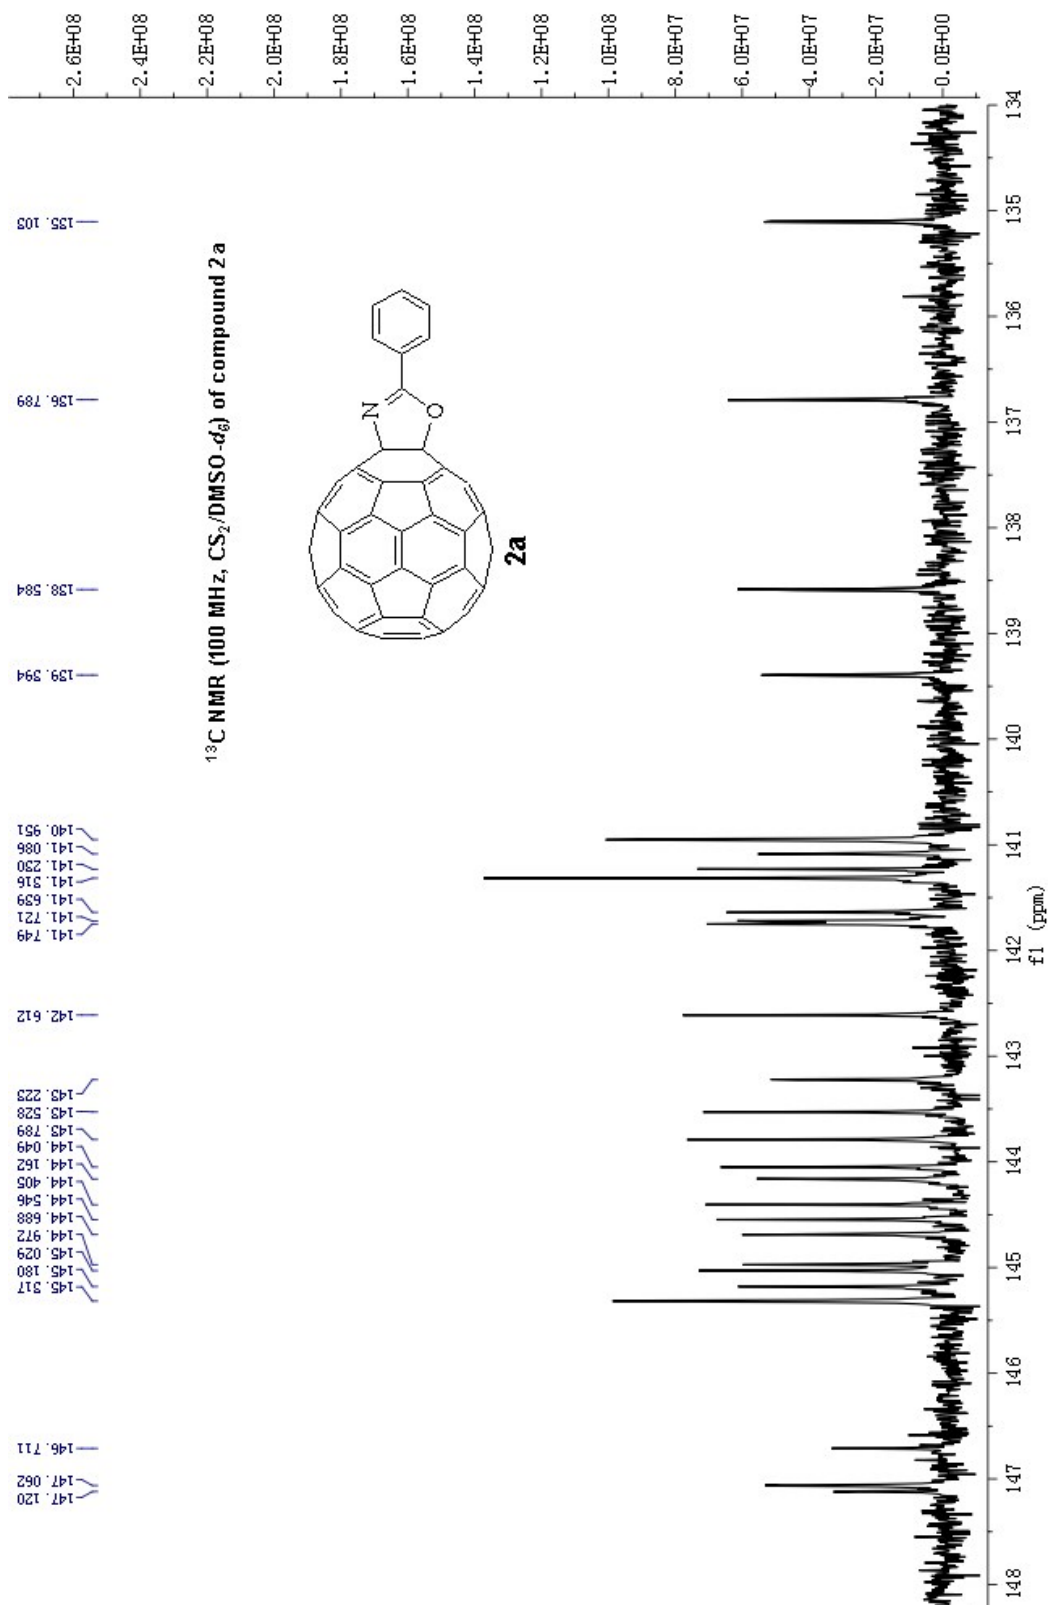

**<sup>1</sup>H NMR (400 MHz, CS<sub>2</sub>/CDCl<sub>3</sub>) of compound 2b**

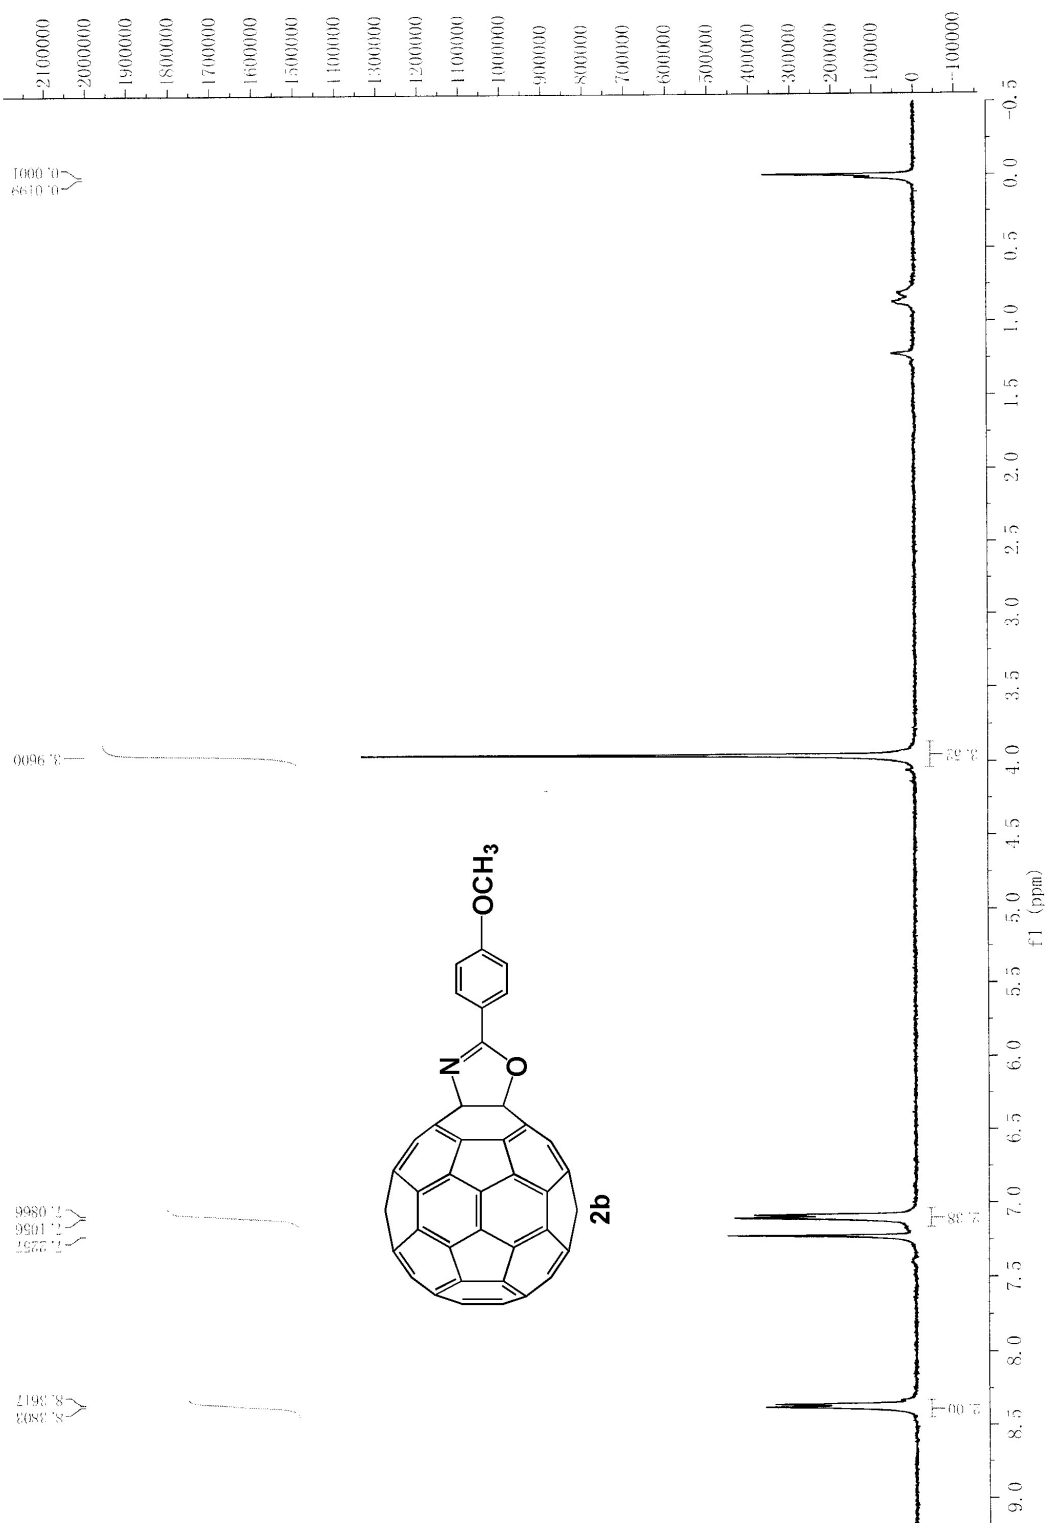



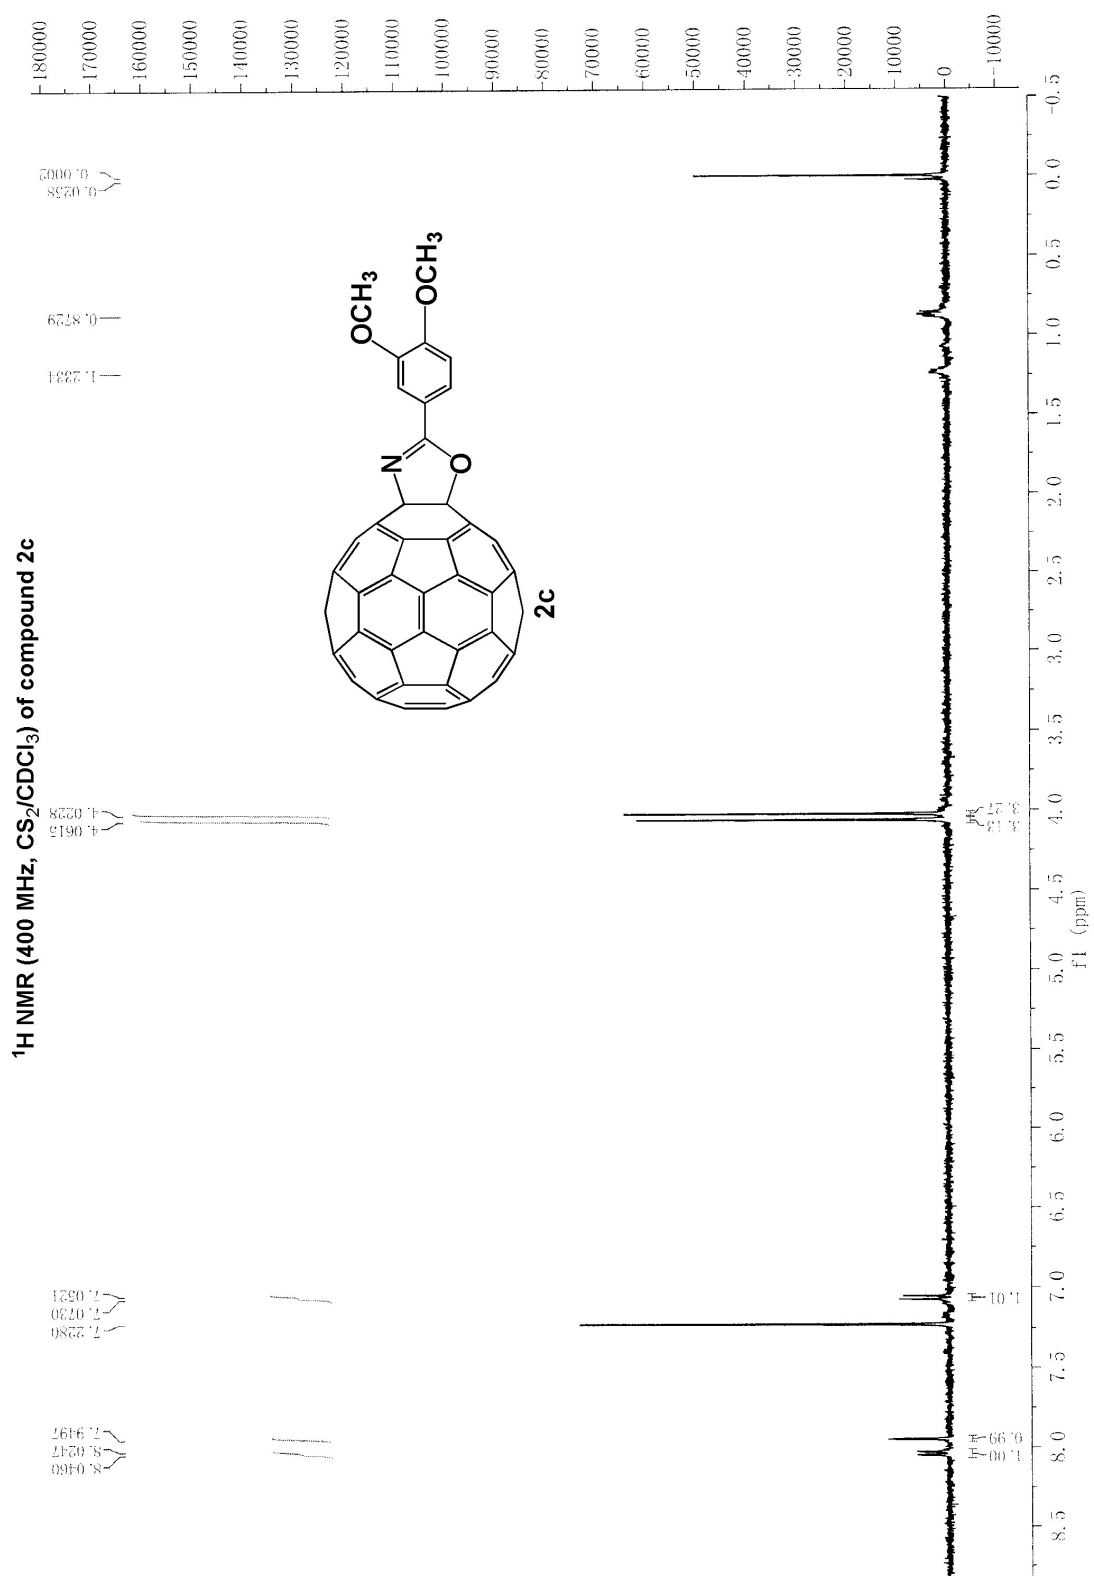

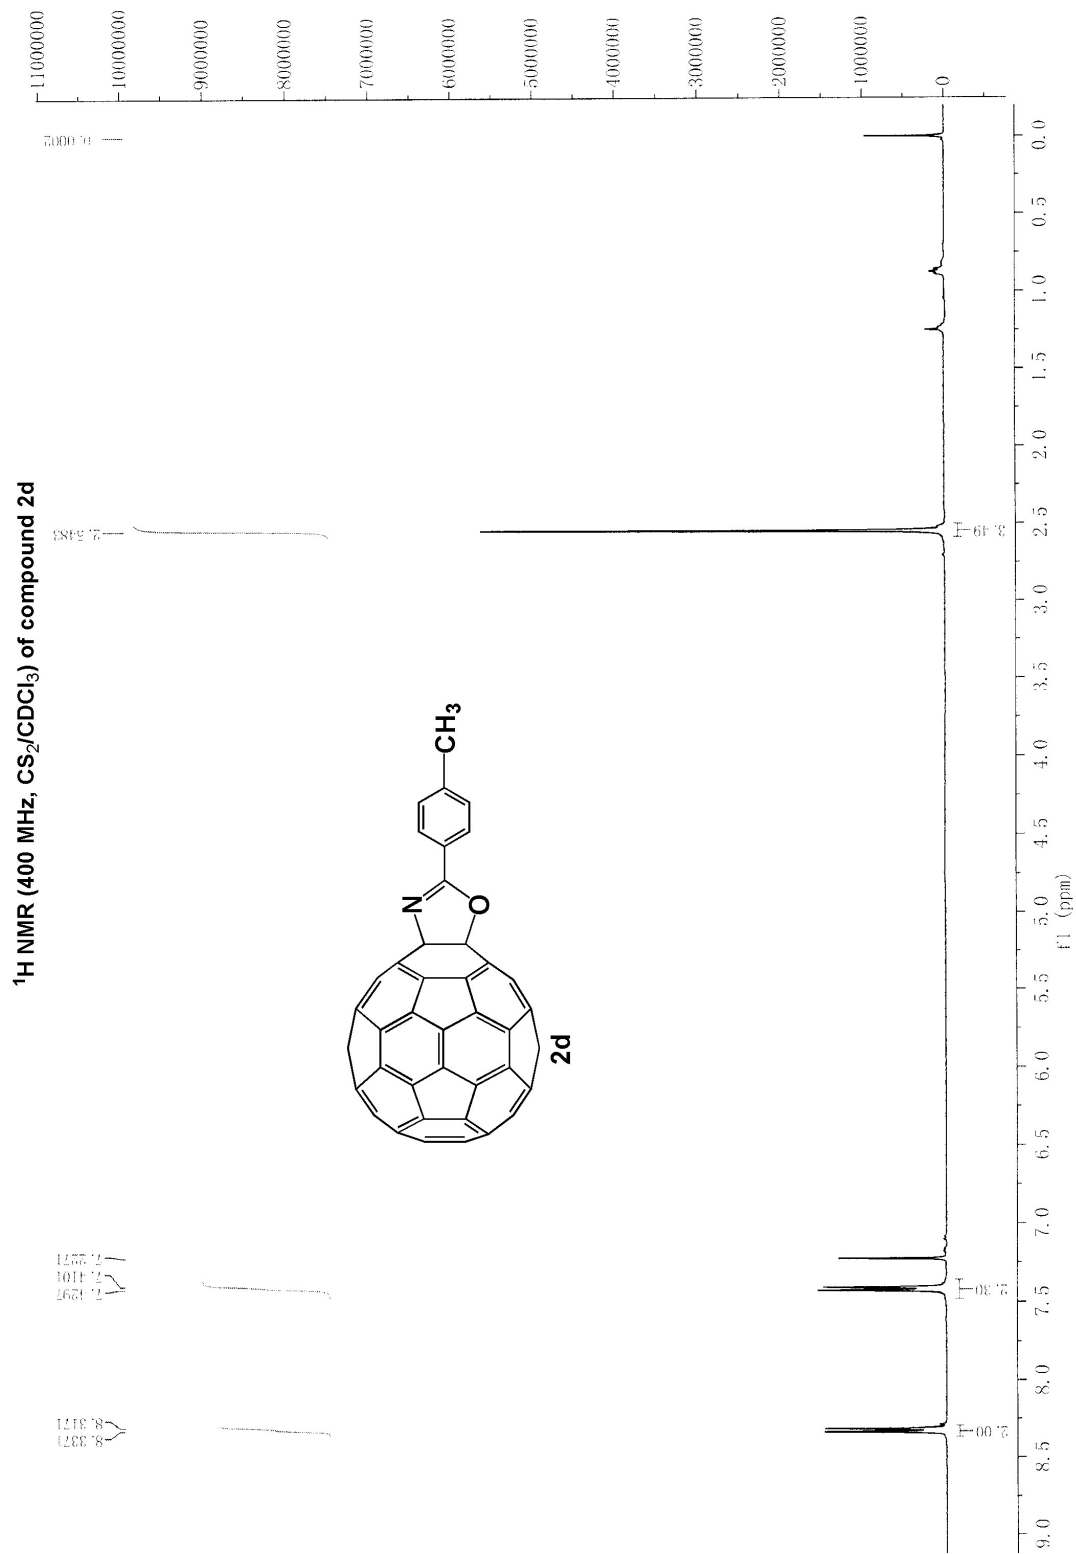

<sup>1</sup>H NMR (400 MHz, CS<sub>2</sub>/DMSO-d<sub>6</sub>) of compound **2e**

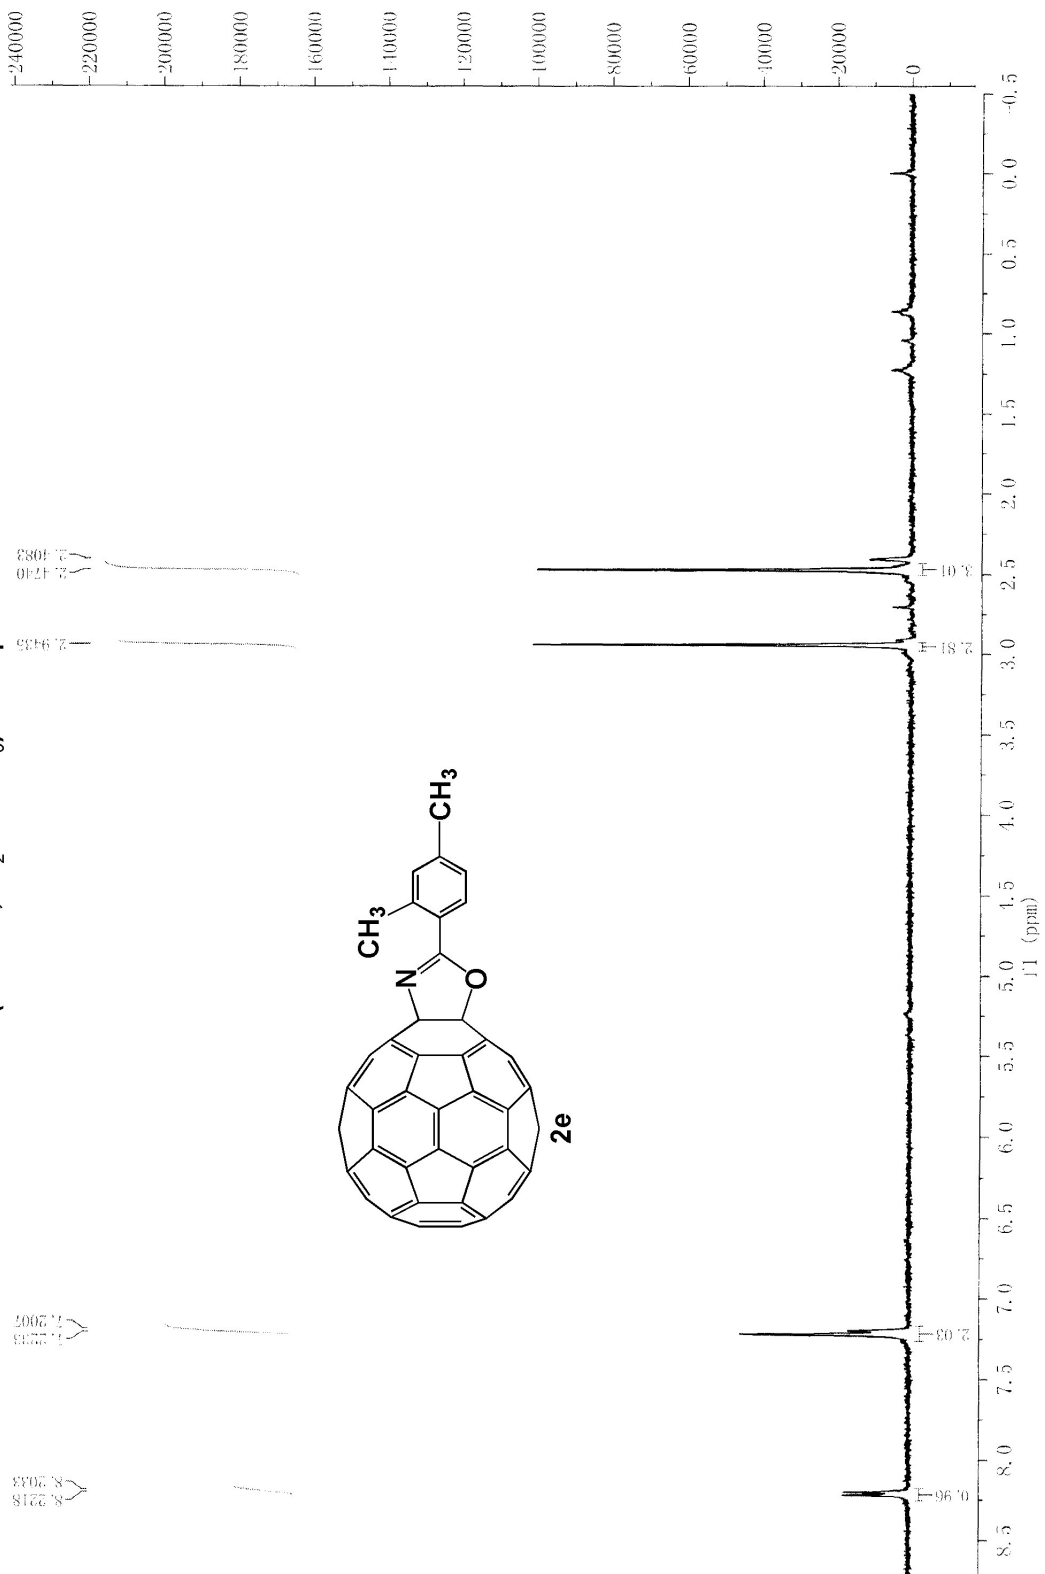

**<sup>1</sup>H NMR (400 MHz, CS<sub>2</sub>/CDCl<sub>3</sub>) of compound 2f**

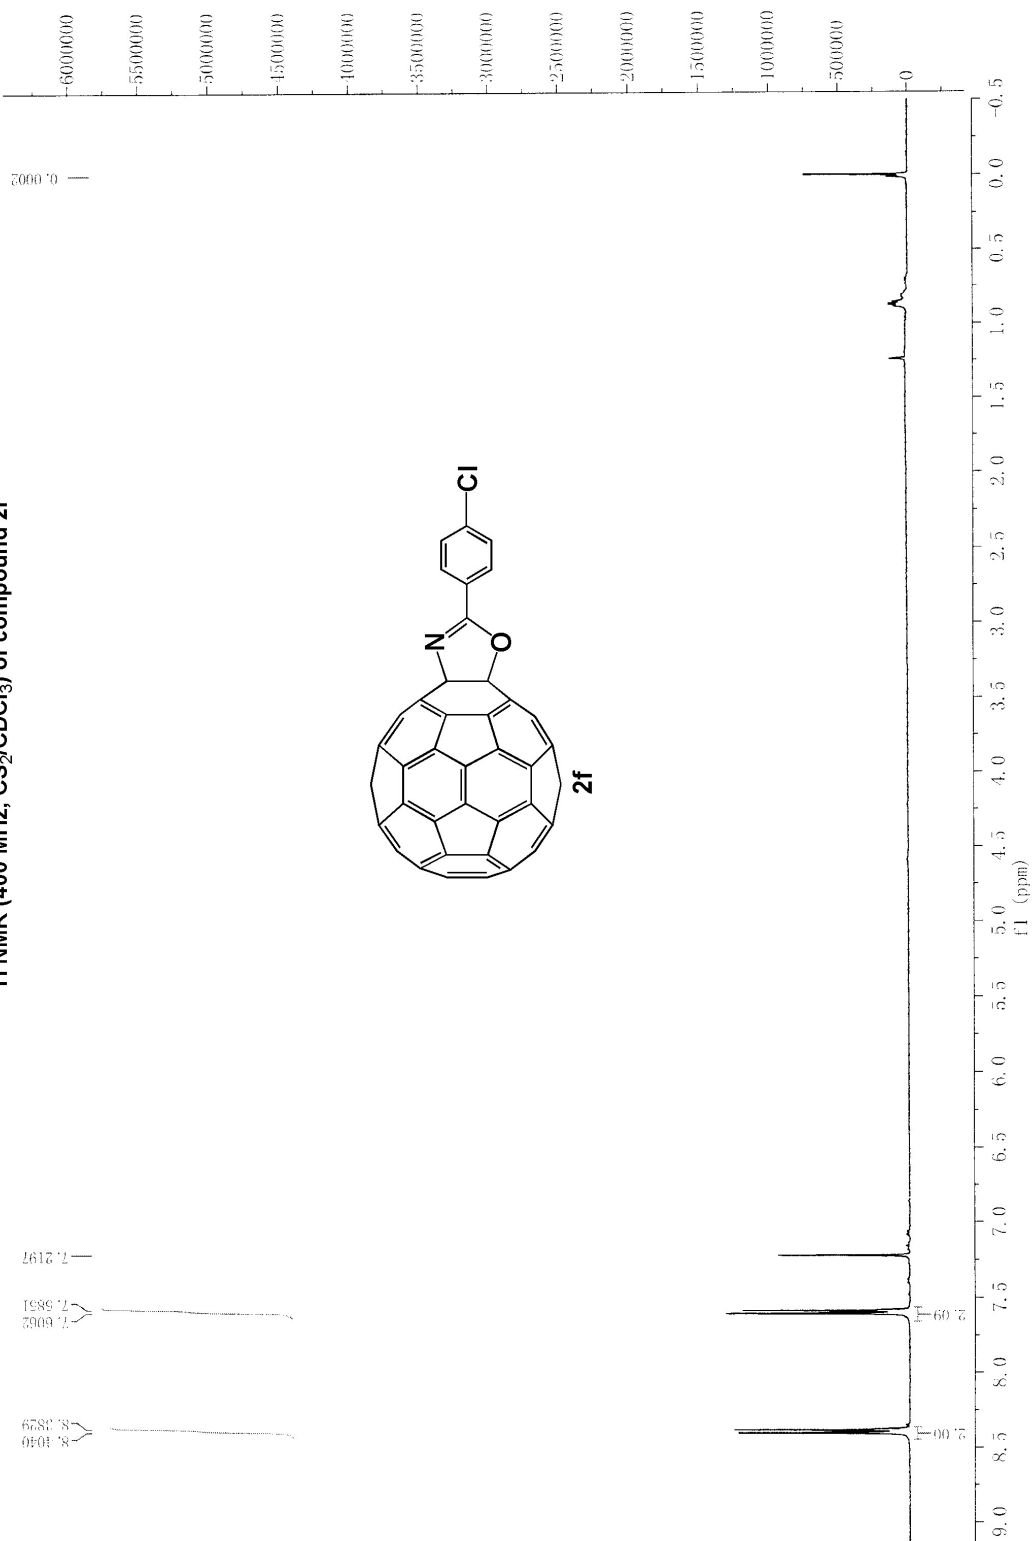

**<sup>1</sup>H NMR (400 MHz, CS<sub>2</sub>/CDCl<sub>3</sub>) of compound 2g**

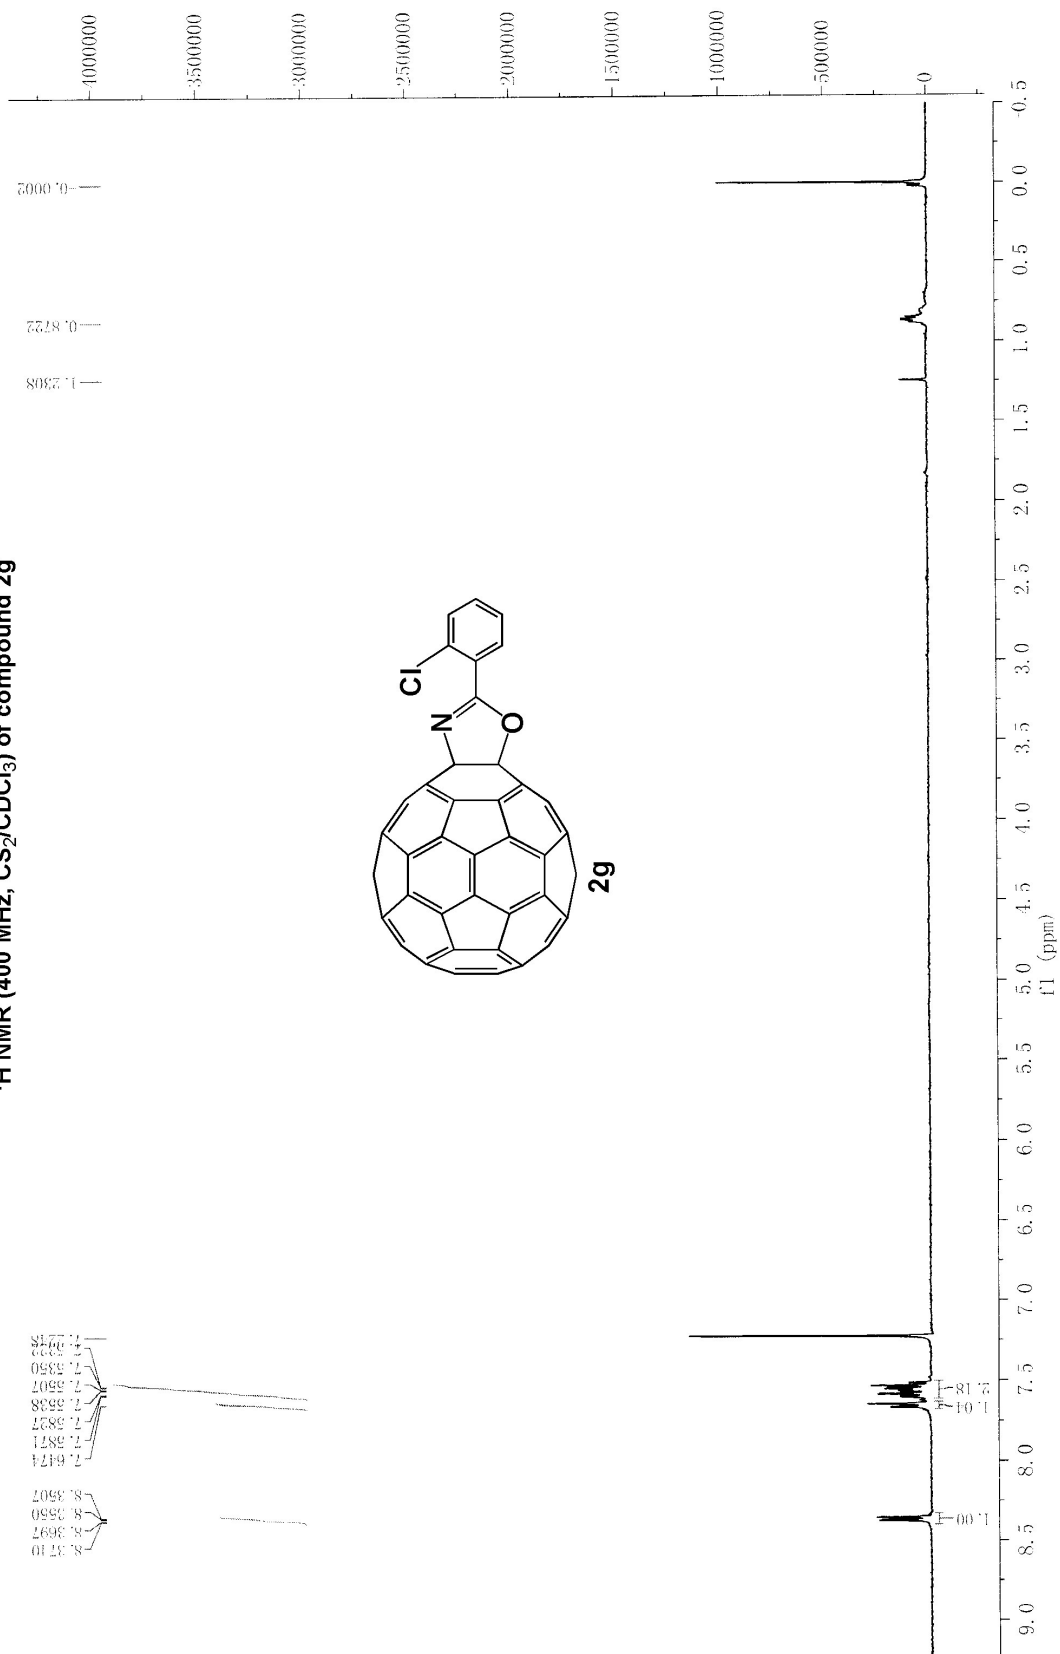

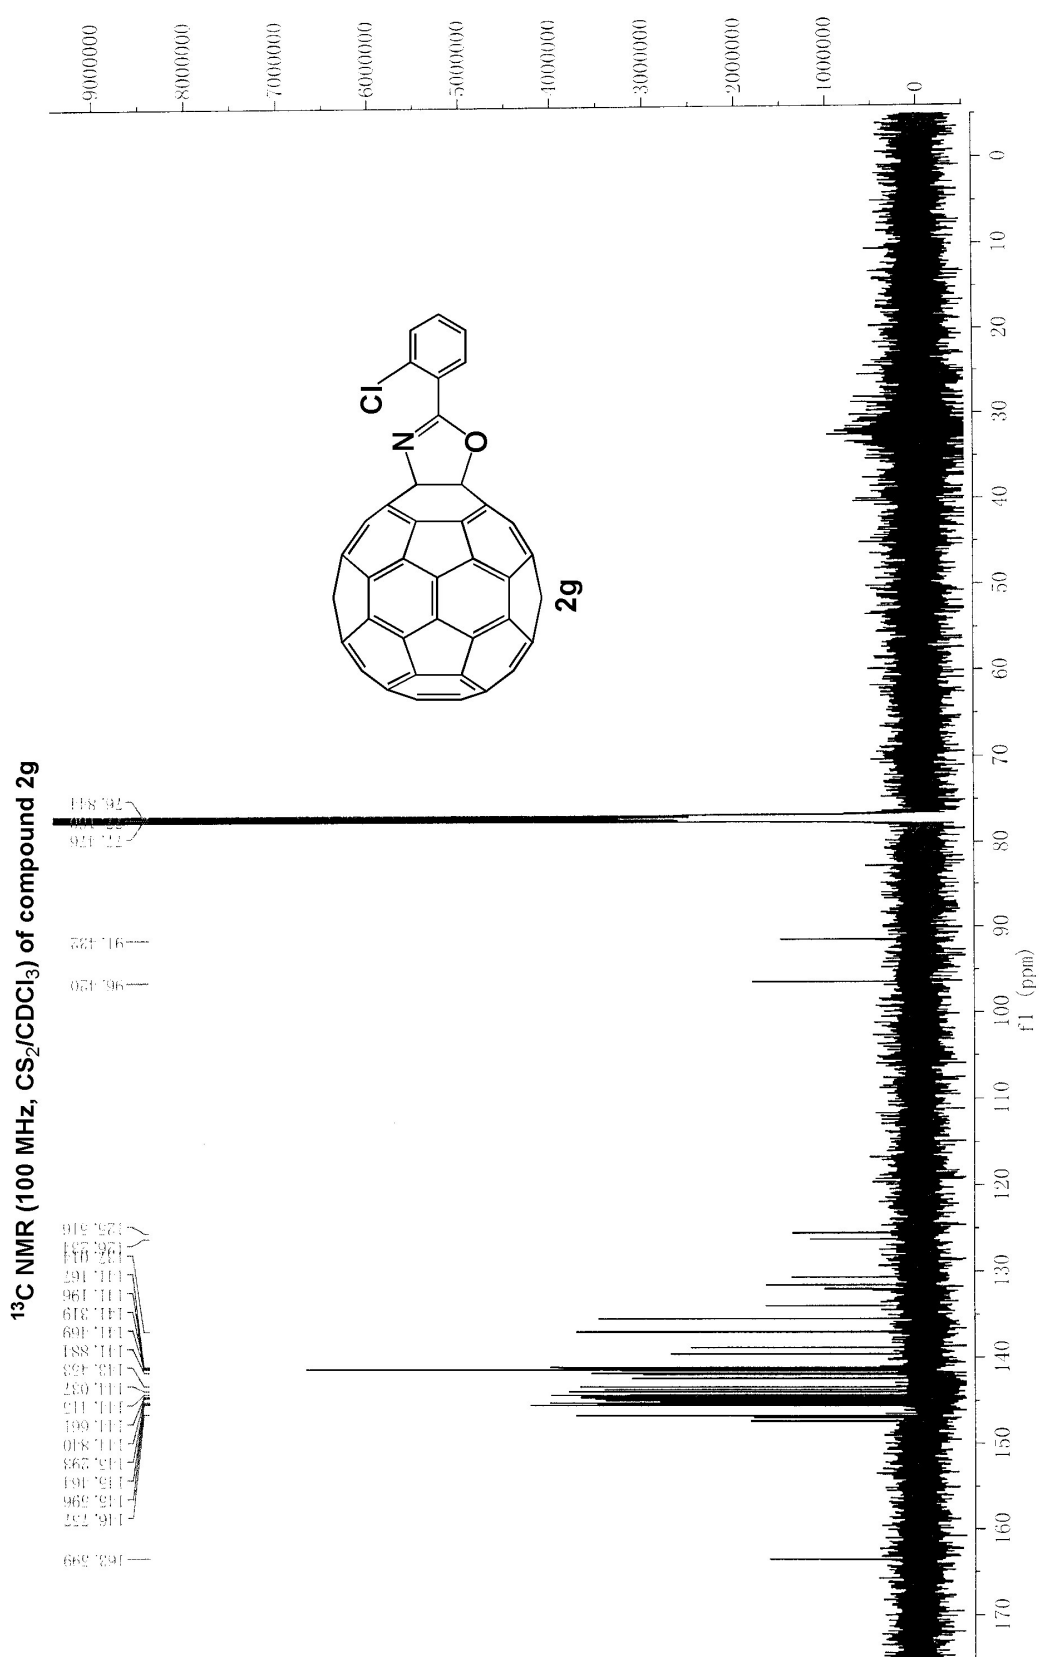

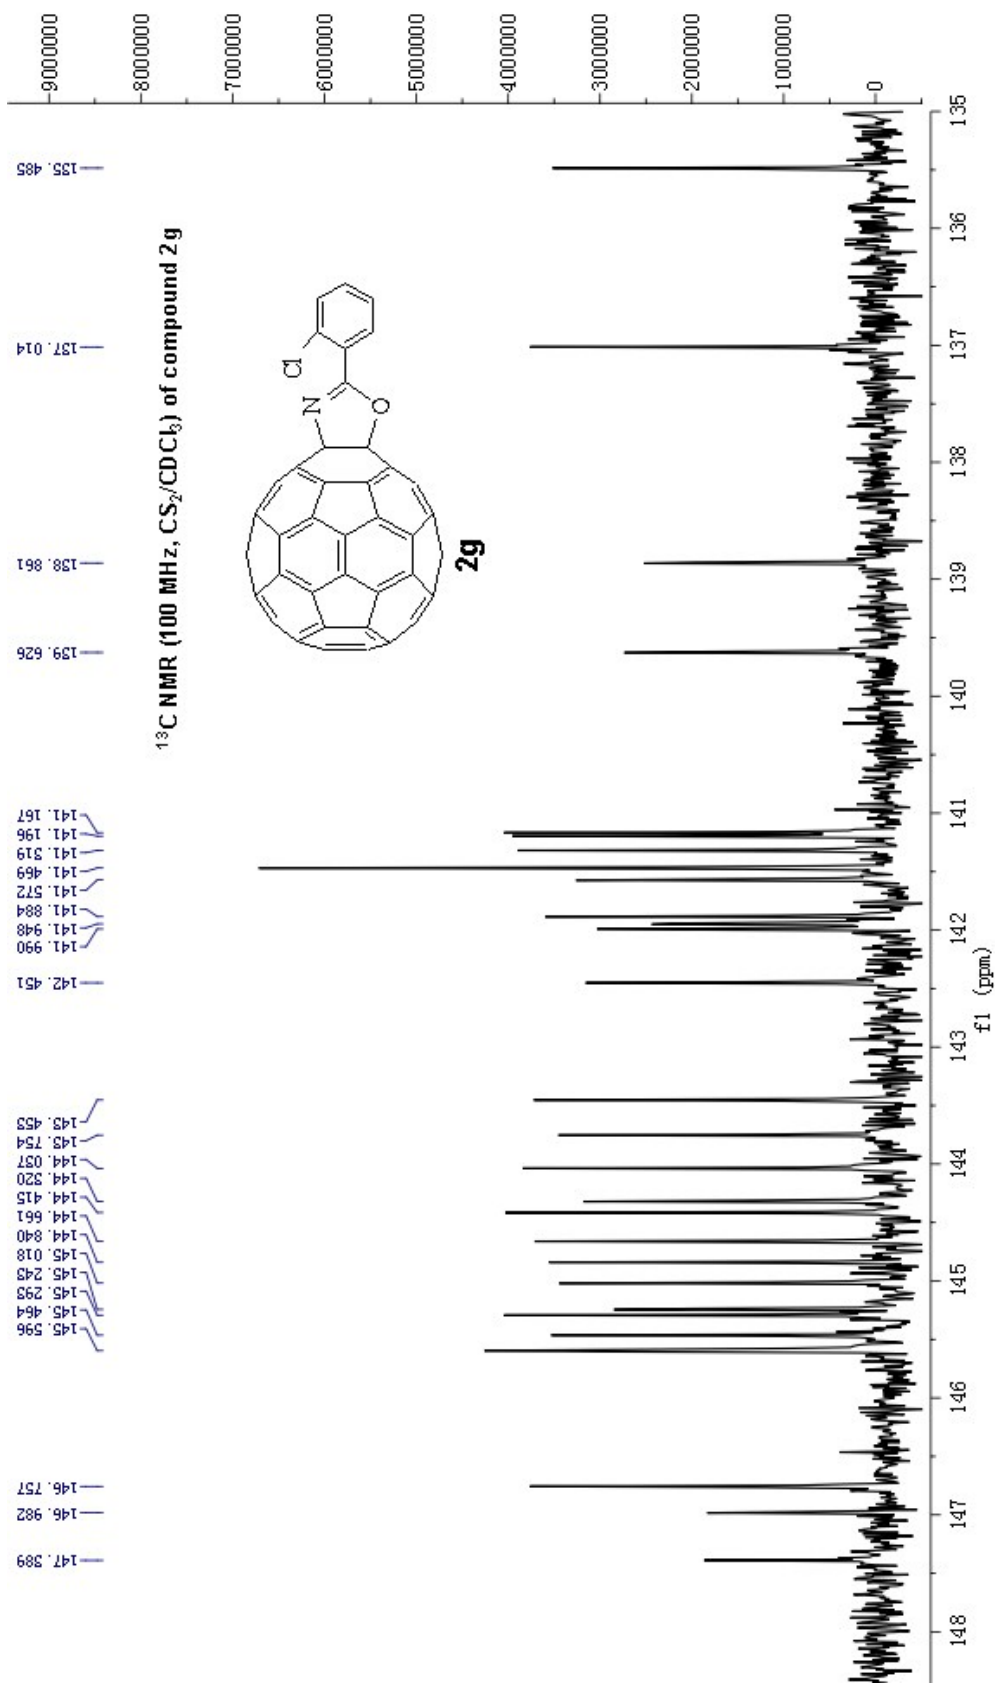

<sup>1</sup>H NMR (400 MHz, CS<sub>2</sub>/CDCl<sub>3</sub>) of compound 2h

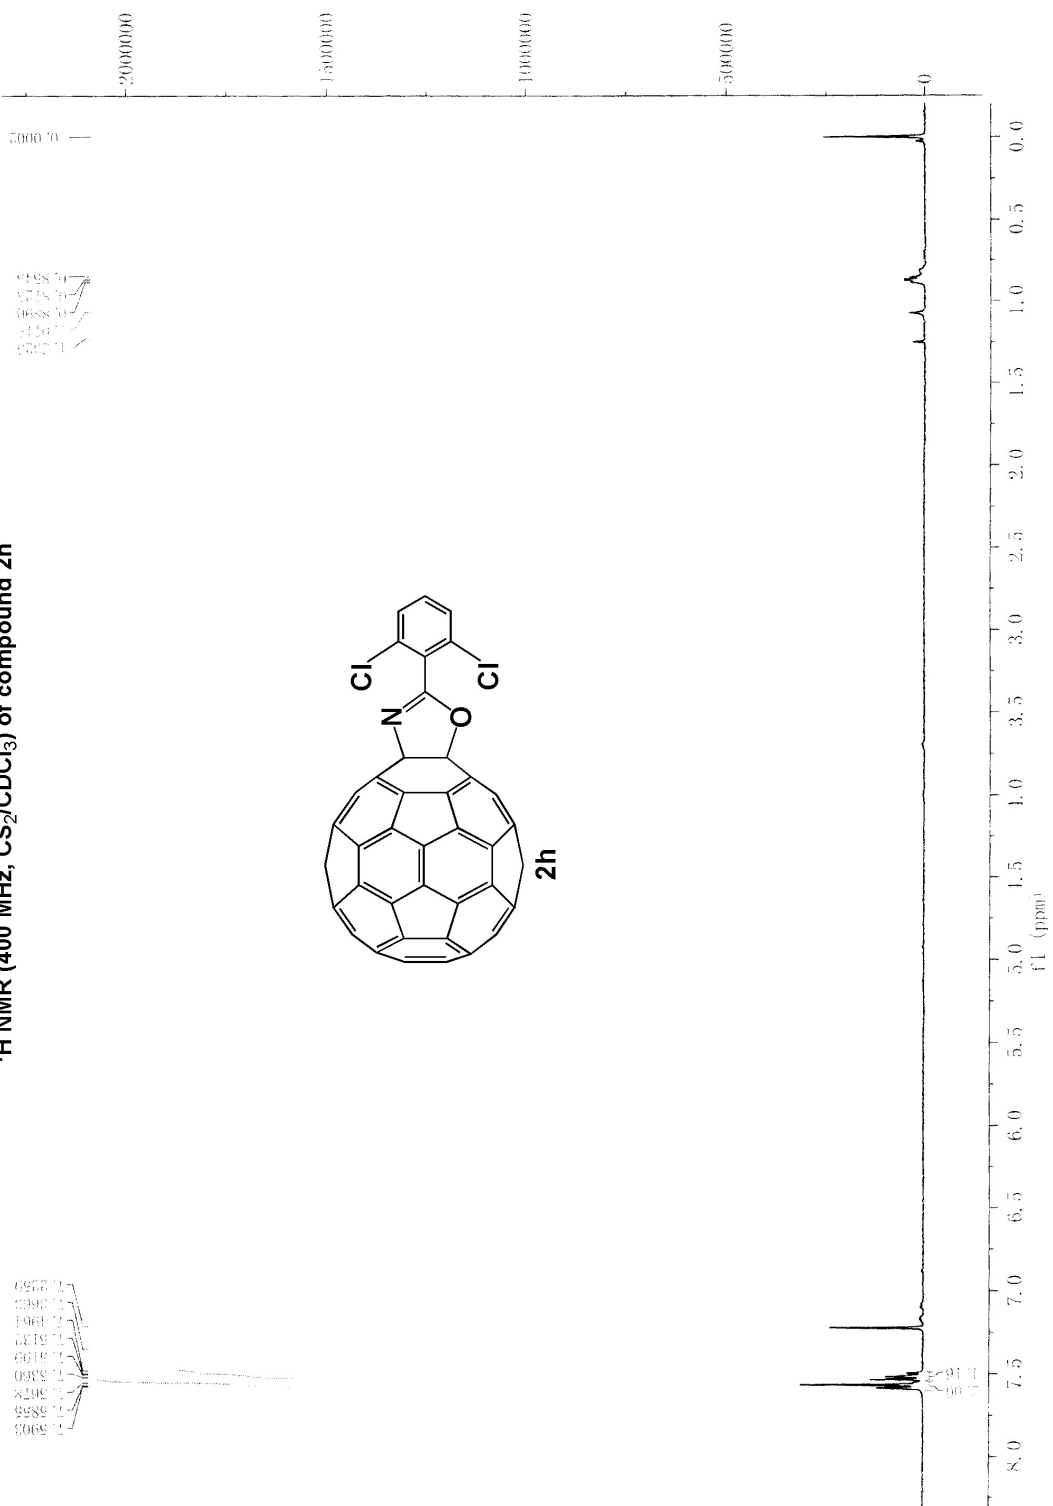



<sup>13</sup>C NMR (100 MHz, CS<sub>2</sub>/DMSO-d<sub>6</sub>) of compound 2h

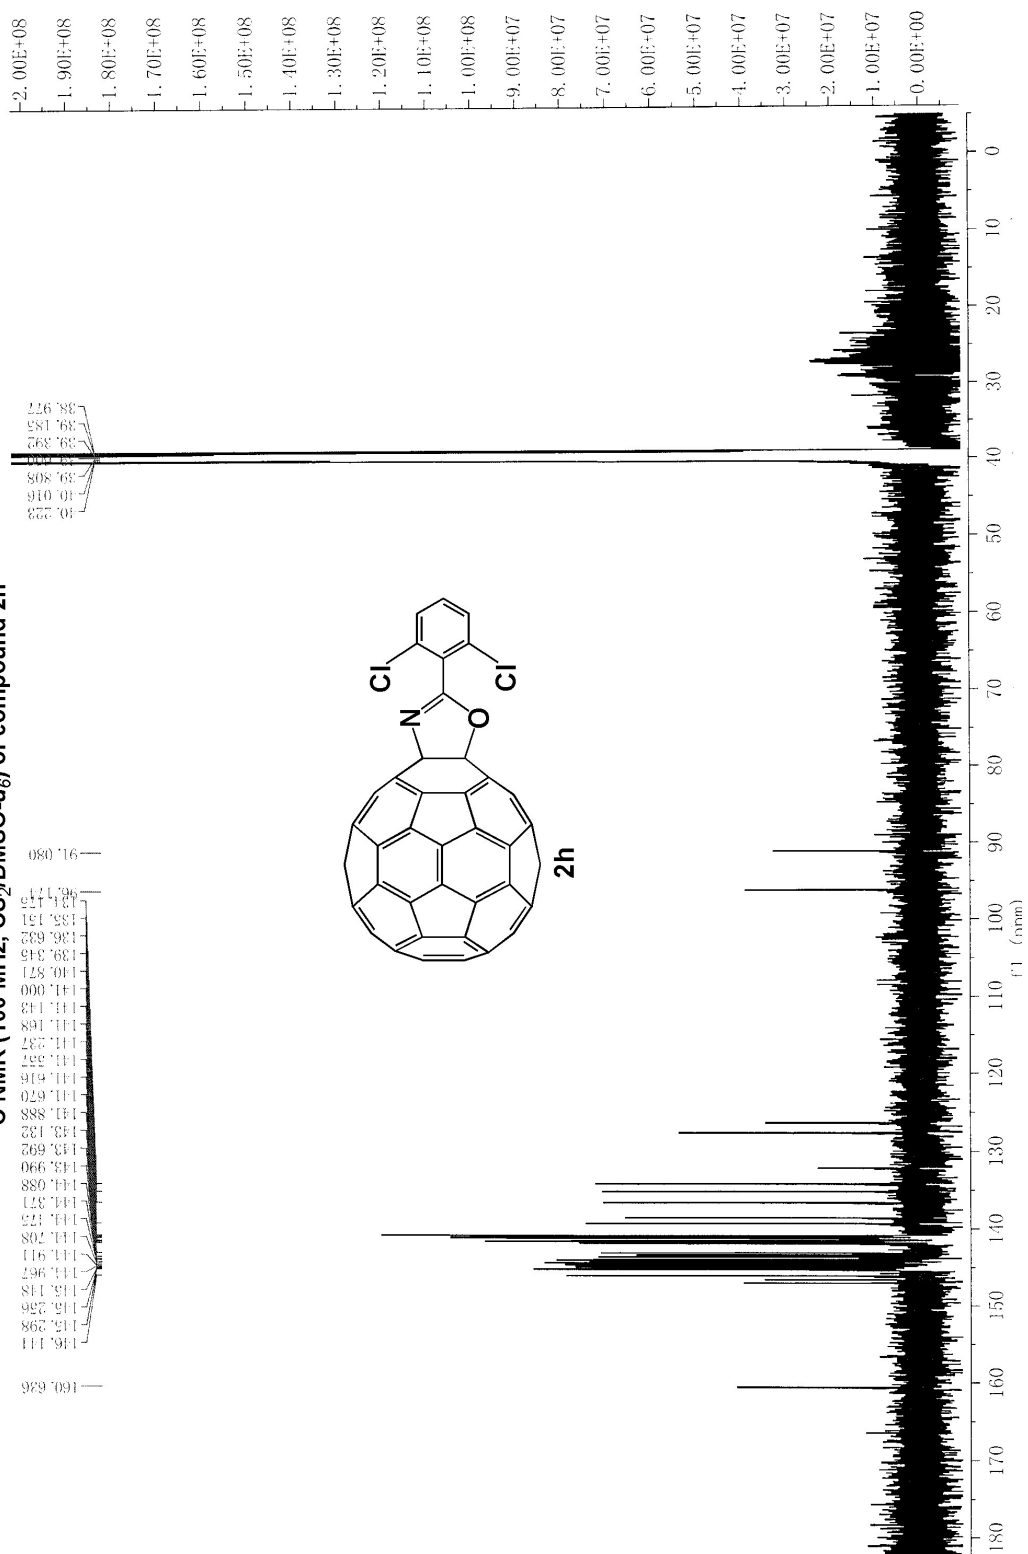

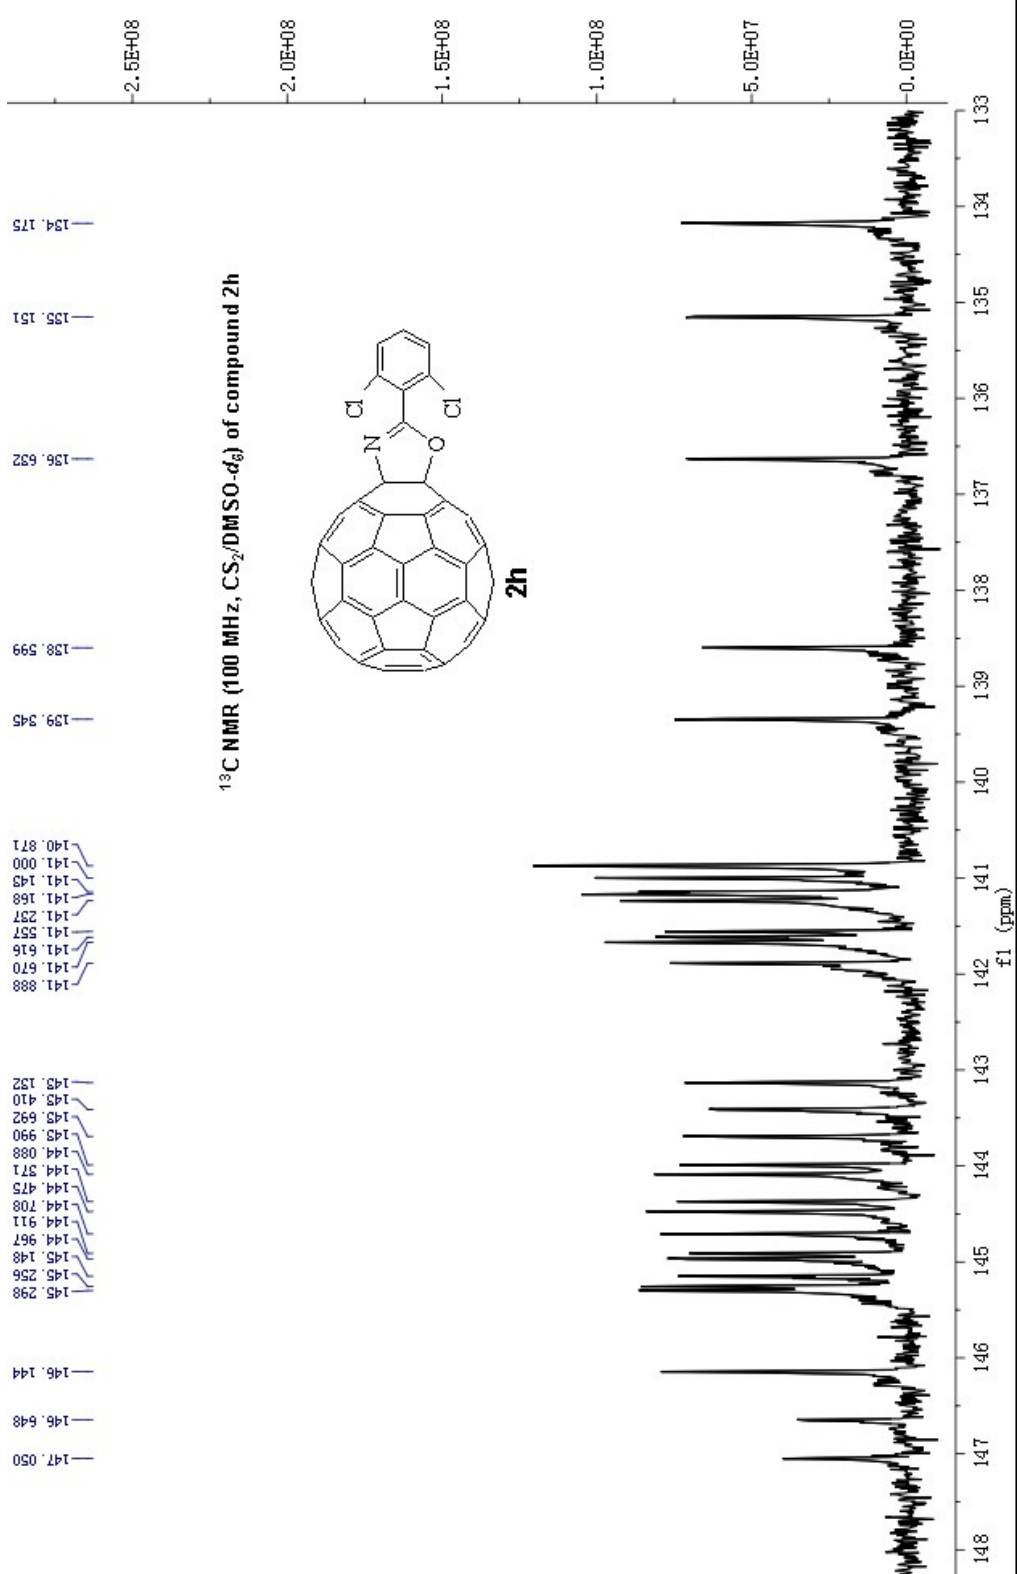

<sup>1</sup>H NMR (400 MHz, CS<sub>2</sub>/CDCl<sub>3</sub>) of compound 2i

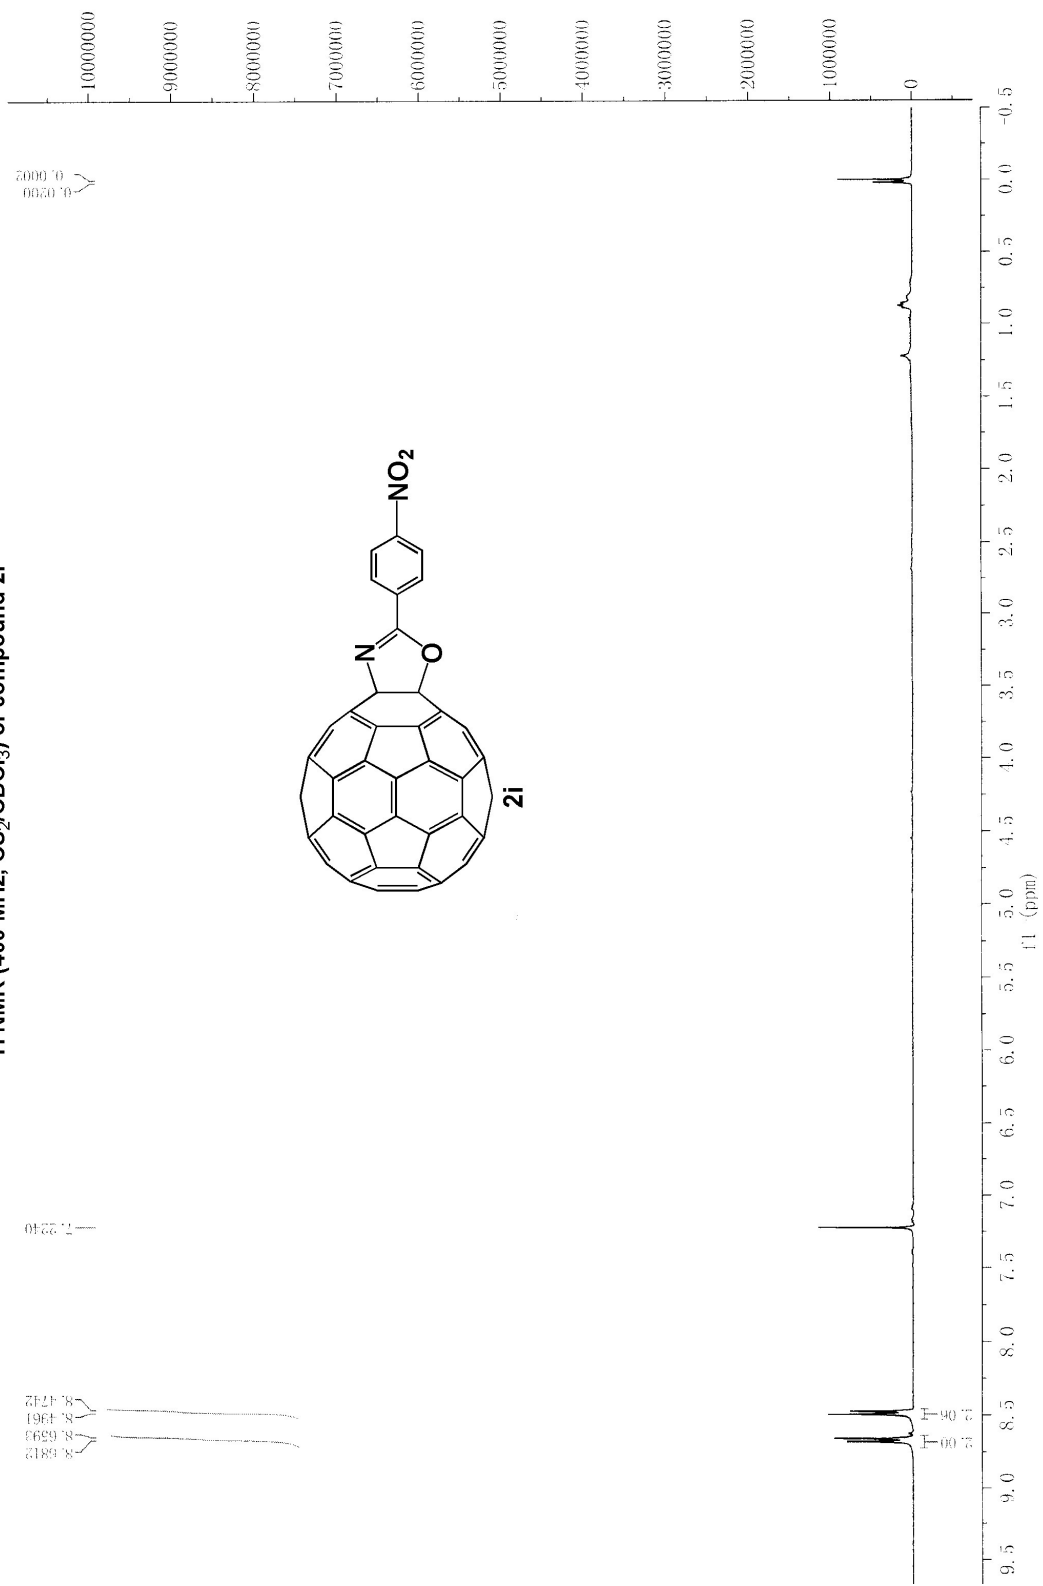

<sup>1</sup>H NMR (400 MHz, CS<sub>2</sub>/CDCl<sub>3</sub>) of compound 2j

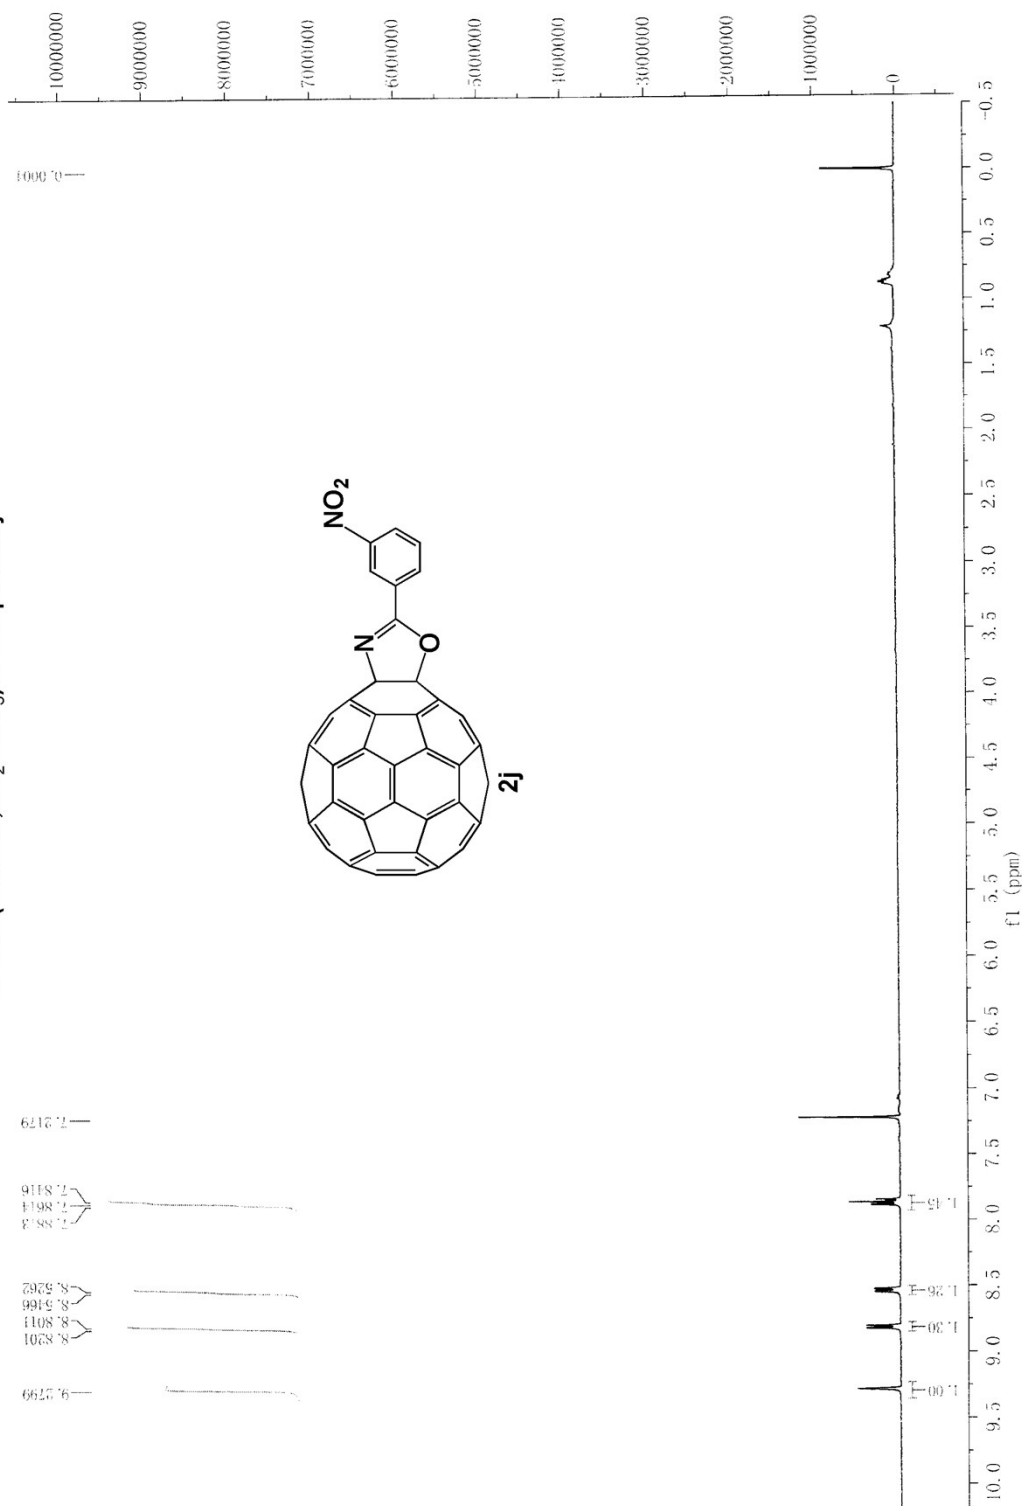

<sup>1</sup>H NMR (400 MHz, CS<sub>2</sub>/CDCl<sub>3</sub>) of compound 2k

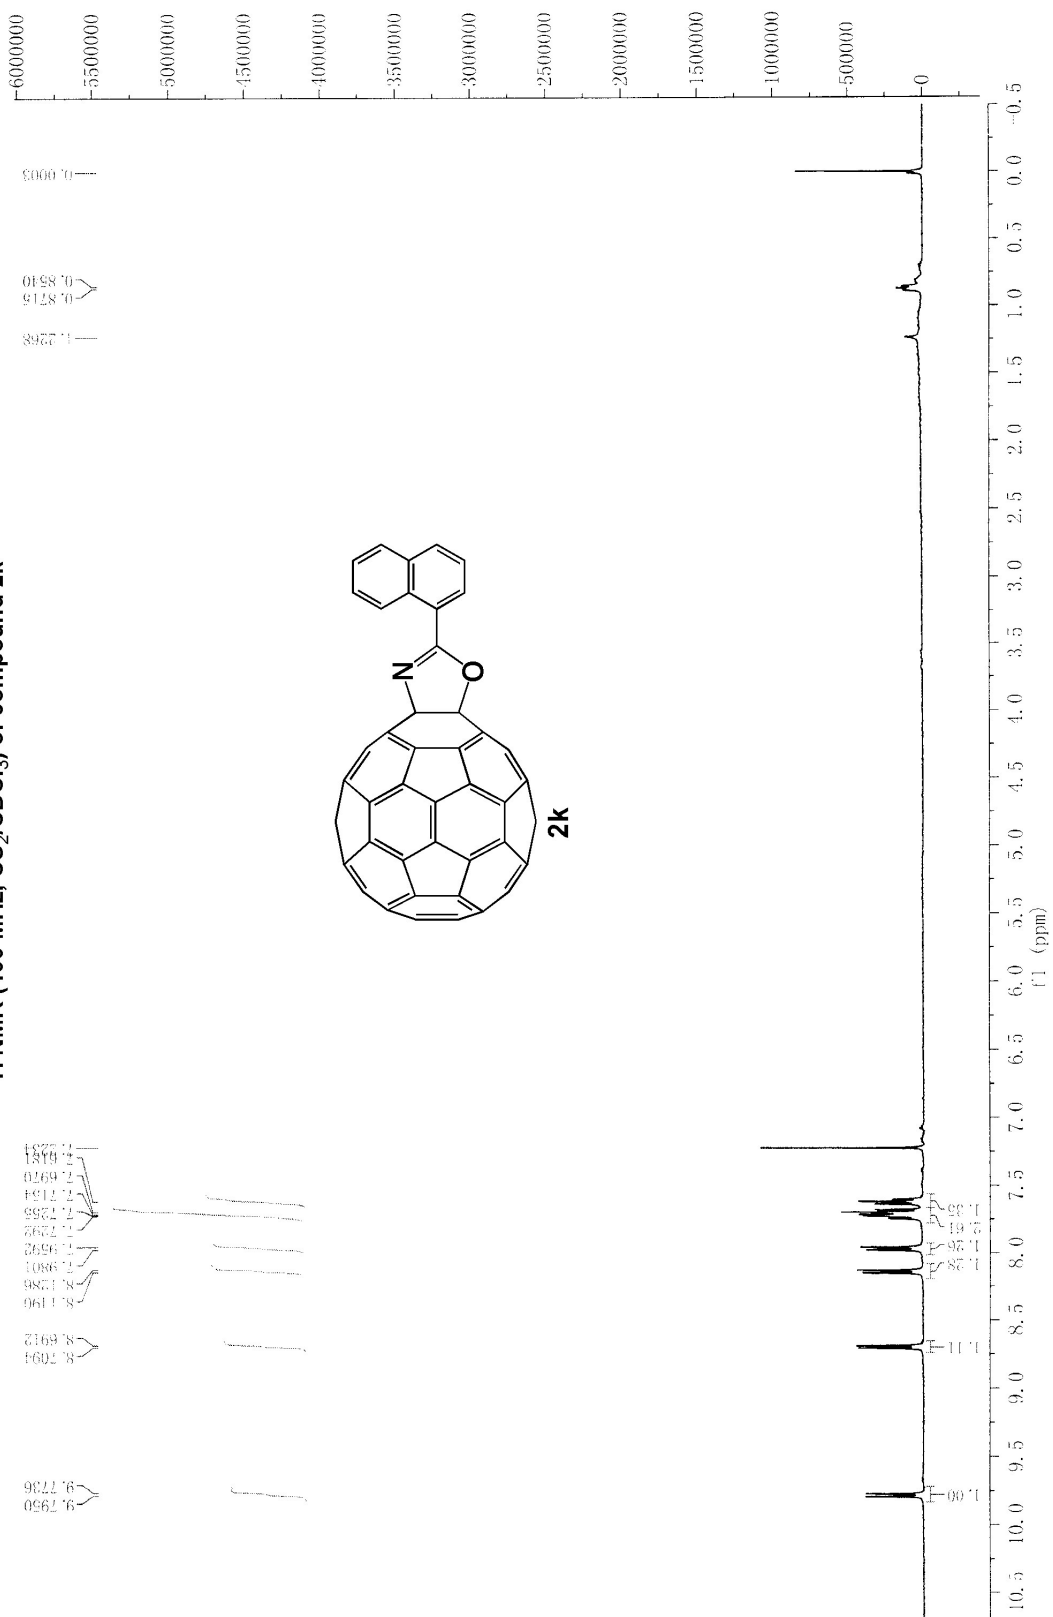

<sup>1</sup>H NMR (400 MHz, CS<sub>2</sub>/CDCl<sub>3</sub>) of compound 21

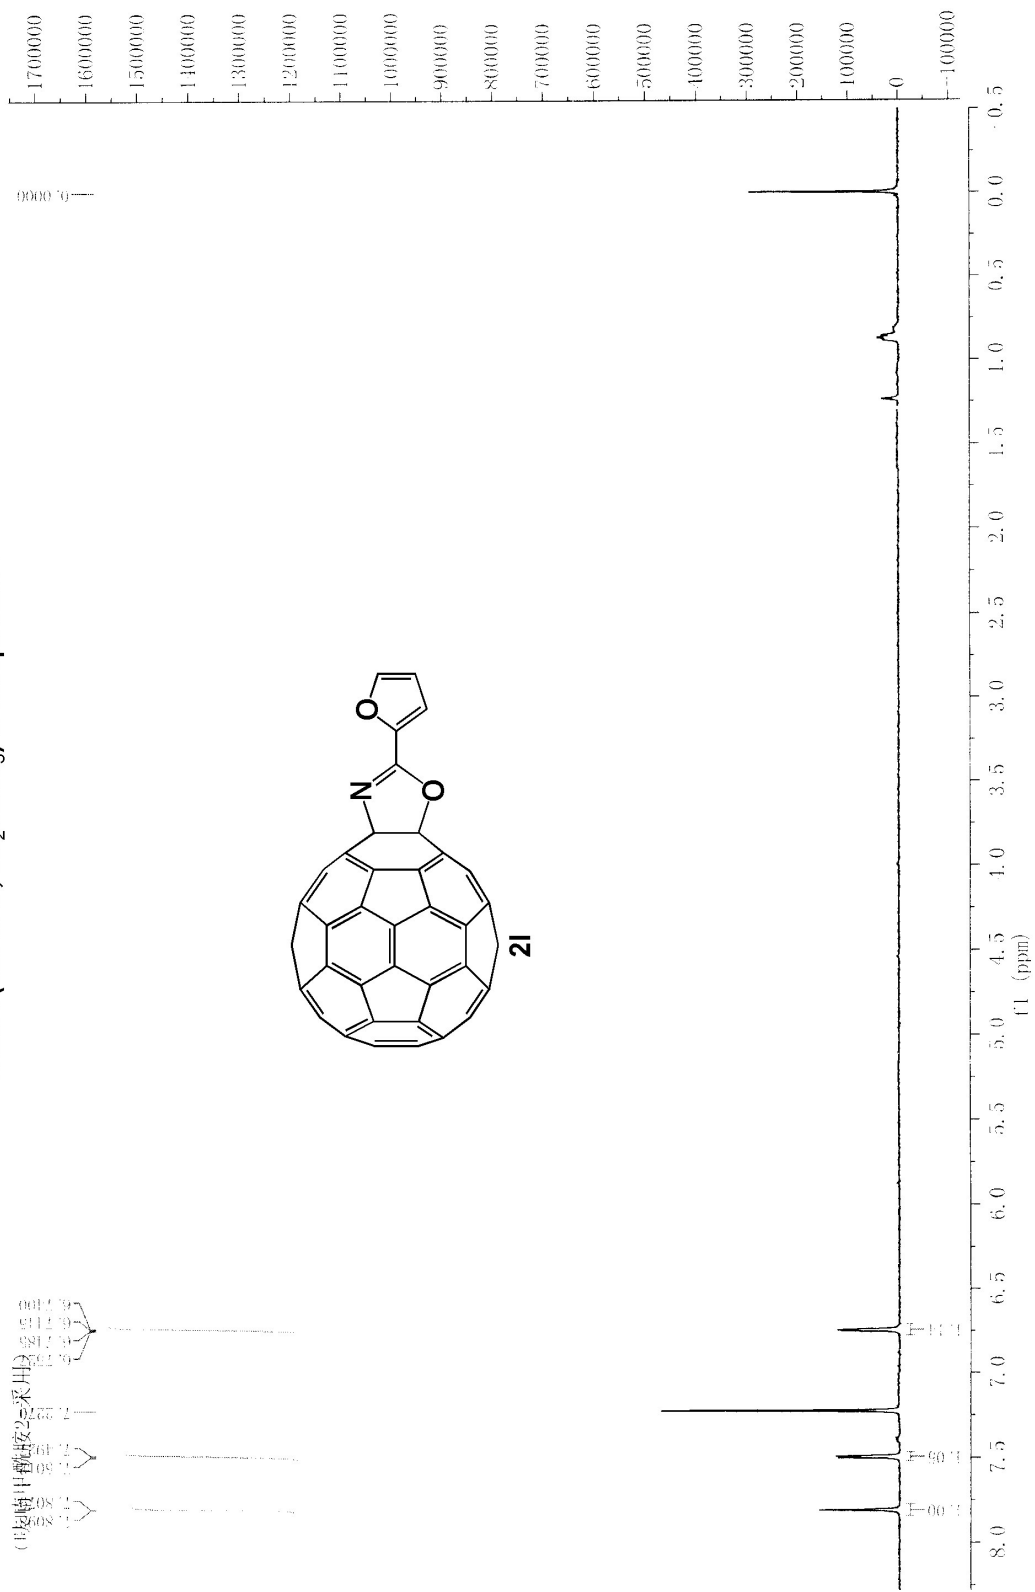

**<sup>1</sup>H NMR (400 MHz, CS<sub>2</sub>/CDCl<sub>3</sub>) of compound 2m**

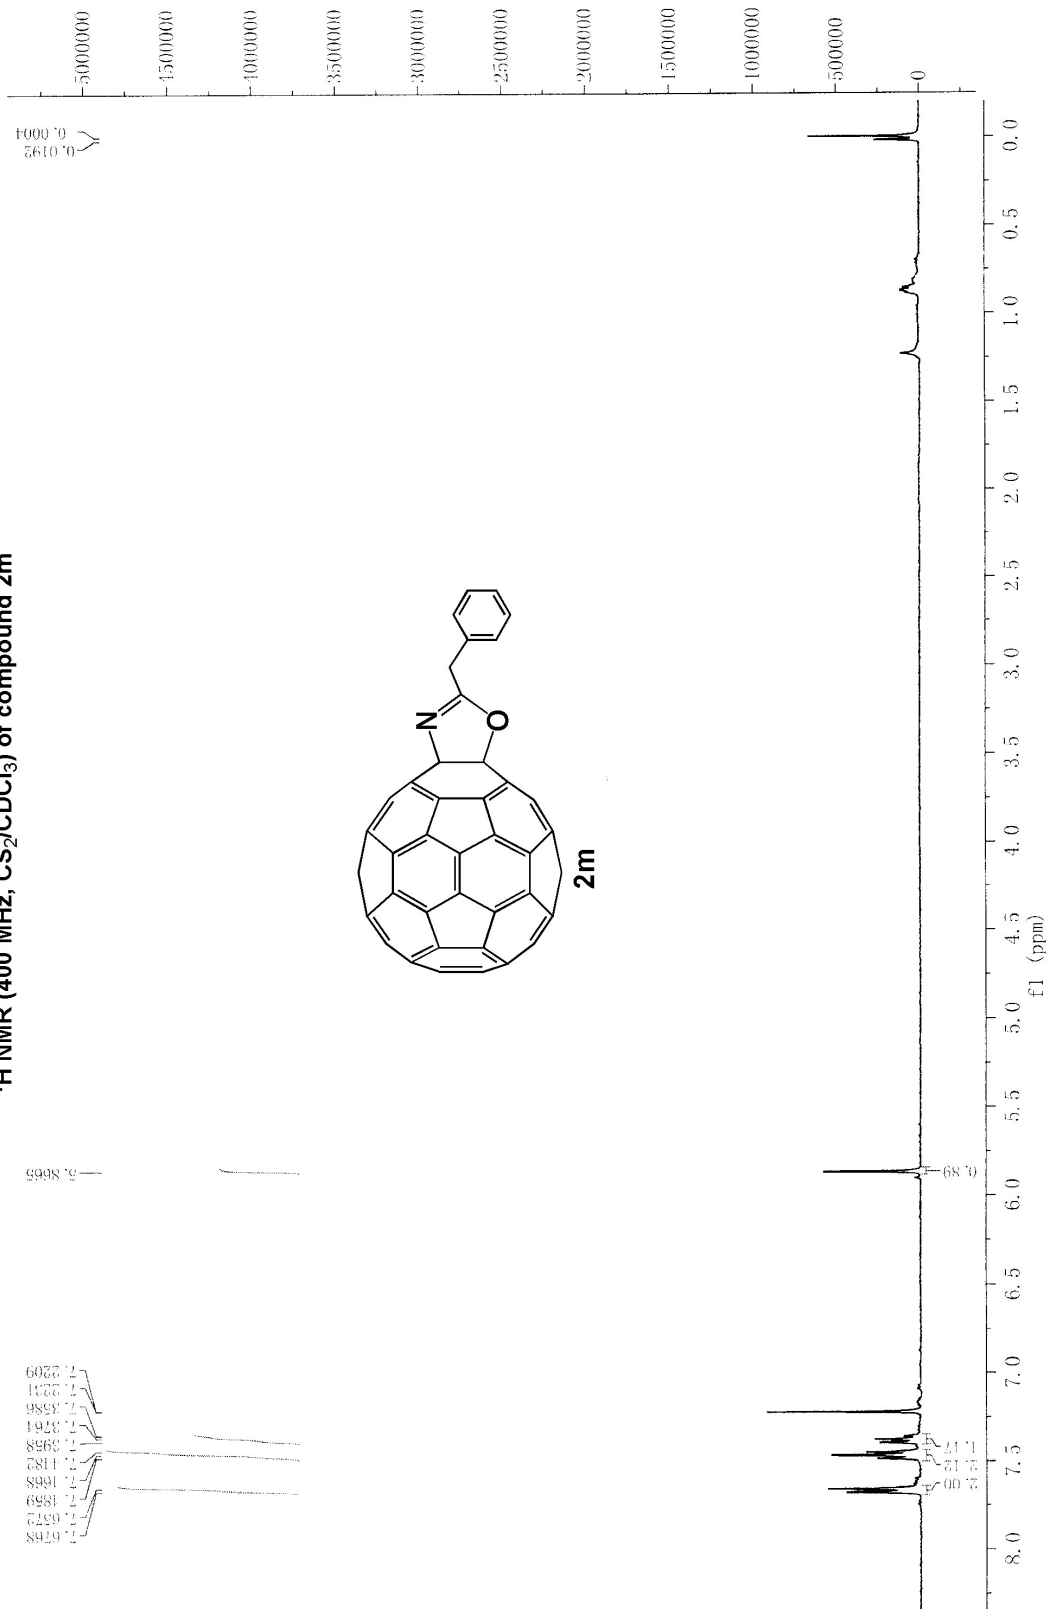

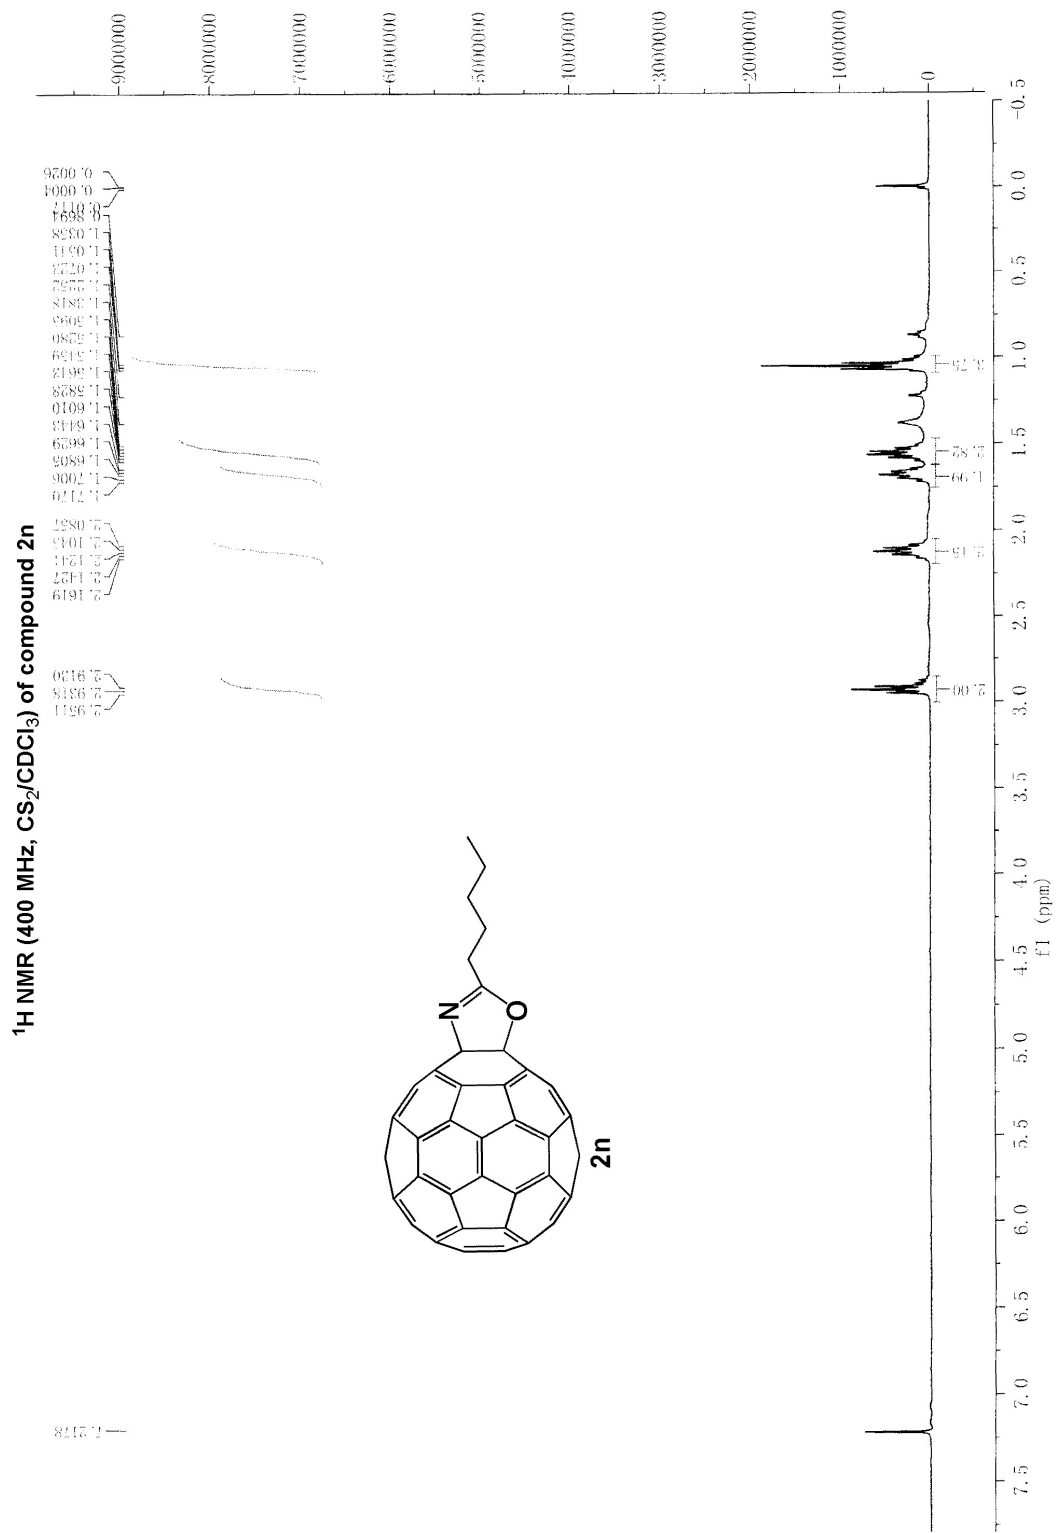



**<sup>1</sup>H NMR (400 MHz, CS<sub>2</sub>(CDCl<sub>3</sub>) of compound 2o**

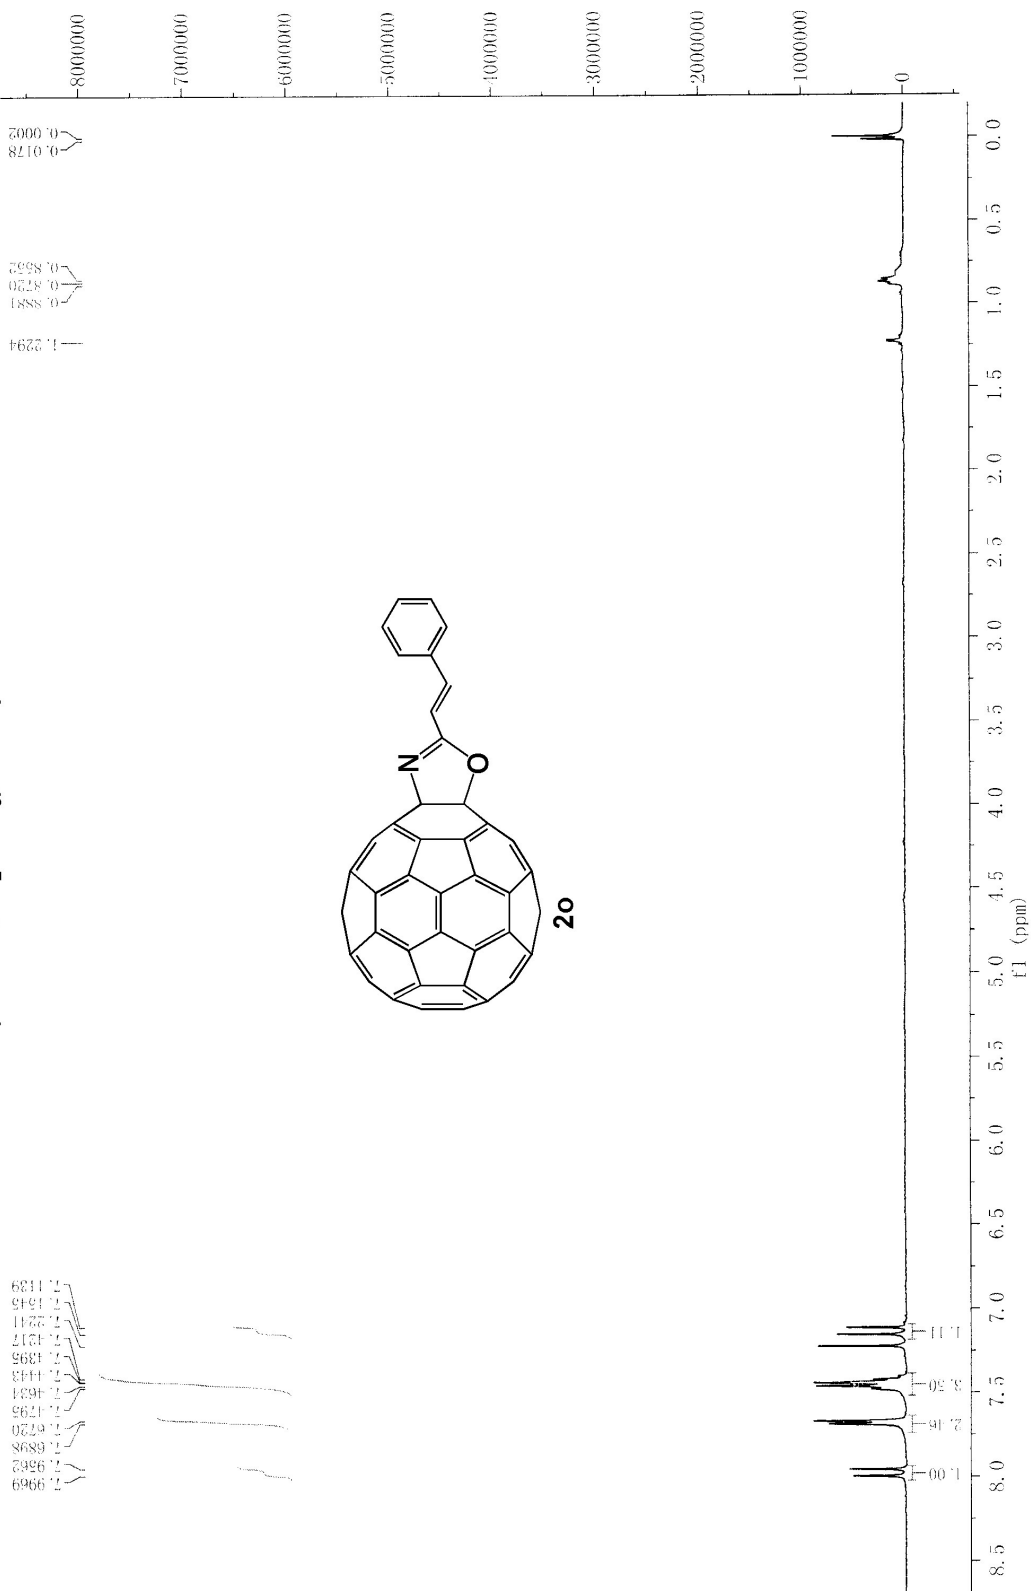

<sup>13</sup>C NMR (100 MHz, CS<sub>2</sub>/CDCl<sub>3</sub>) of compound 2o

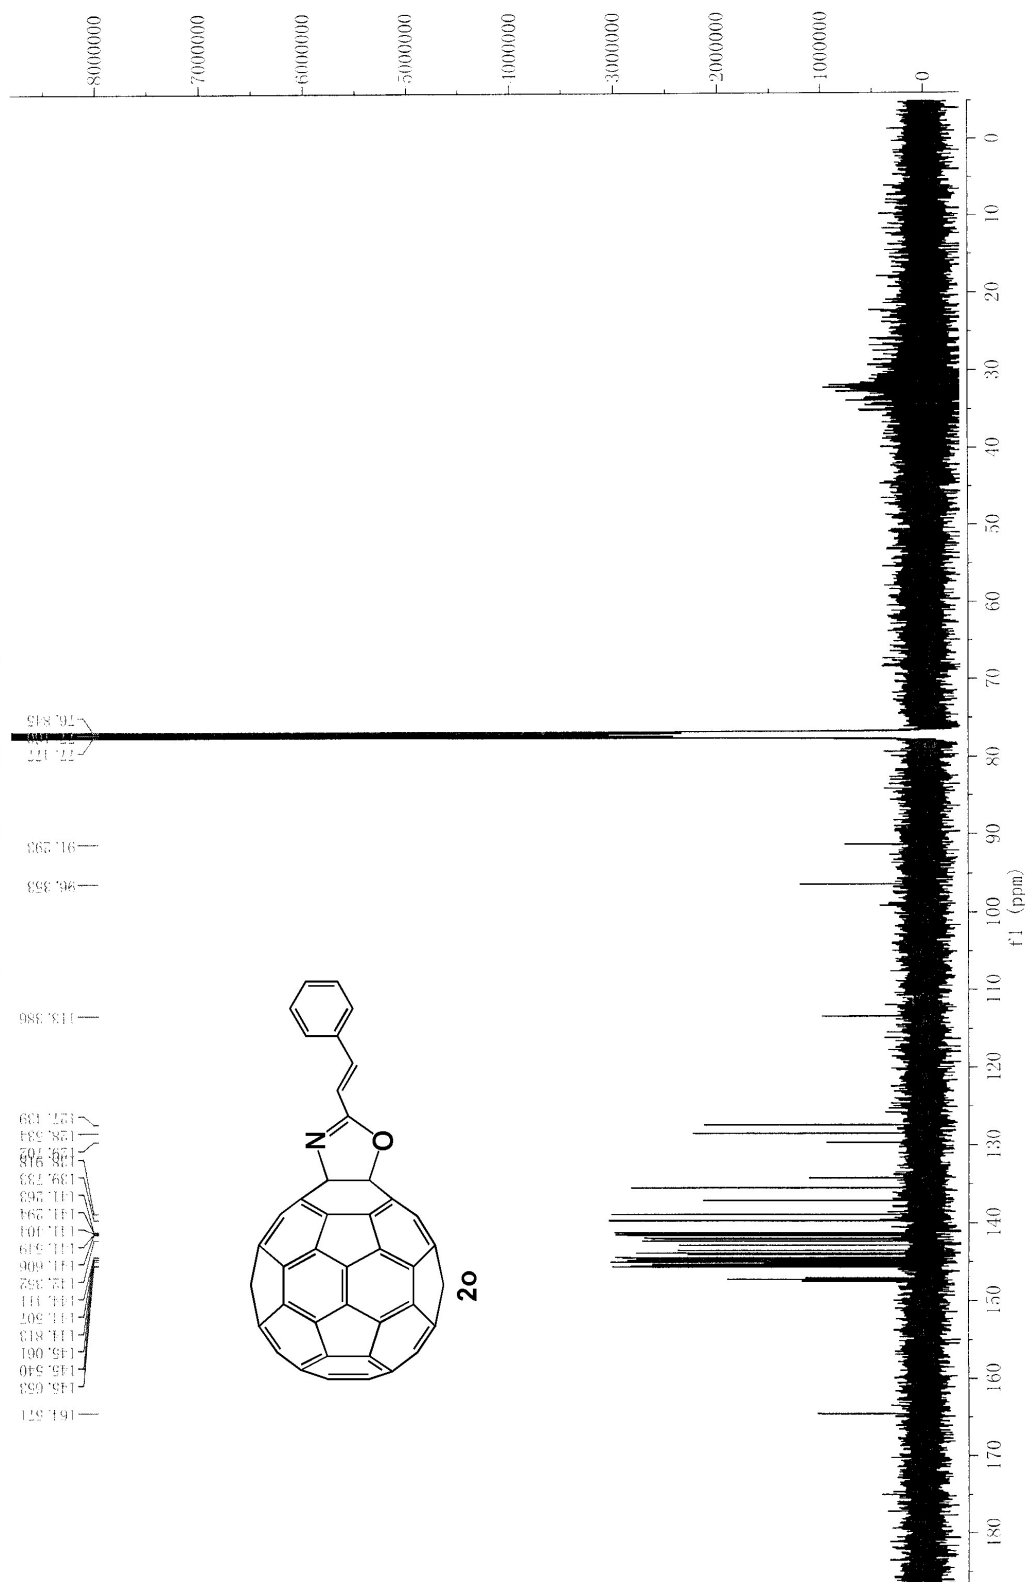

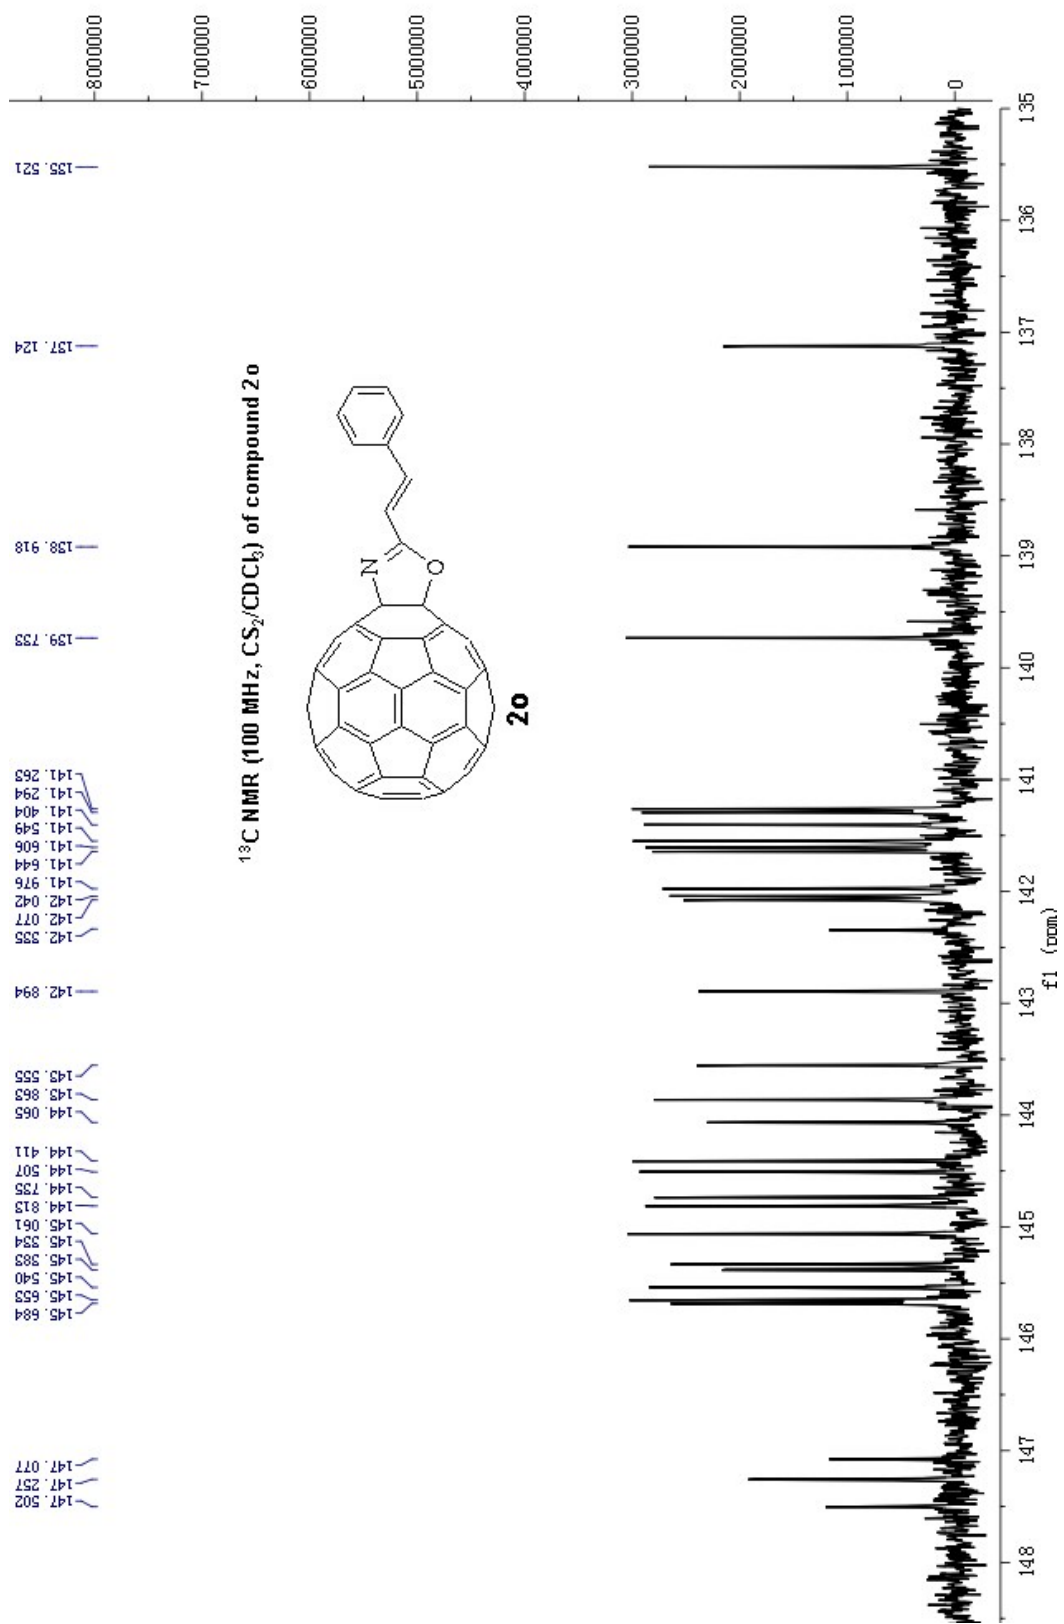

Supplement: c5nj02503f1.pdf [file c5nj02503f1.pdf]
